# Supplementary material for: Assessment of medical information on irritable bowel syndrome information in Wikipedia and Baidu Encyclopedia: comparative study
Source: PeerJ journal article supplement (doi:10.7717/peerj.17264), 2024-05-24

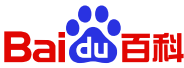

激躁性大肠症候群

进入词条

全站搜索

帮助

近期有不法分子冒充百度百科官方人员，以删除词条为由威胁并敲诈相关企业。在此严正声明：百度百科是免费编辑平台，绝不存在收费代编服务，请勿上当受骗！[详情>>](#)

首页

秒懂百科

特色百科

用户

知识专题

权威合作

下载百科APP

个人中心

# 激躁性大肠症候群

播报

编辑

讨论

上传视频

肠胃道疾病

**激燥性大肠症**(Irritable Bowel Syndrome) 是临床上最常见到的肠胃道疾病，虽然该病不是致命的疾病，但病人常有很大的痛苦，并且医师在治疗时有爱莫能助和灰心丧气的感觉。

激燥性大肠症常见于青年或中年人，女/男 比例1：2。主要表现为**慢性便秘**，间歇性腹泻或两者均有。

**中文名** 激躁性大肠症候群  
**外文名** Irritable Bowel Syndrome

**性 质** 医学  
**类 别** 疾病

|    |        |        |        |
|----|--------|--------|--------|
| 目录 | 1 疾病类型 | 3 病理生理 | 5 治疗方式 |
|    | 2 临床表现 | 4 诊断要点 | 6 预防保养 |

## 疾病类型

**激燥性大肠症**有三种：

(一) 慢性无痛间歇性腹泻： 很多人都有胃肠毛病，如腹泻、便秘、胀气等却又查不出原因所在。

(二) 慢性间歇性腹痛与便秘：**痉挛性结肠炎**的病人主诉有慢性腹痛和便秘。

(三) 腹泻与便秘交替出现： 还有一些病人可出现上述两种表现，便秘与腹泻交替出现。

## 临床表现

典型病人可数年或数月内间断出现水样腹泻，常在清晨或早餐后腹泻加重，在排泄3-4次带大量黏液的稀便后，病人其余时间均感觉正常。整天腹泻，或总是夜间腹泻者很少见。腹泻可持续几周或数月，随后自动消失一段时间。有些病人无腹泻而排泄“铅笔样”糊状大便。病人另一种典型的表现是慢性腹痛，伴便秘，或者便秘与腹泻交替出现。这些病人主诉间断性下腹部绞痛，排气或排便后可缓解。激燥性大肠症还常有胃灼热、明显腹胀、**背痛**、软弱、疲乏、心悸等。

## 病理生理

激燥性大肠症的基本病理生理异常是肠运动改变。**结肠痉挛**的病人（腹痛和便秘）静止时结肠动力增加。

与此相反，主要表现为腹泻的病人静止时结肠动力减弱。某些**激燥性大肠症**病人可有显著精神异常的证据。常见的有忧郁、歇斯底里、强迫症。

精神刺激也可使症状加重。然而应该注意的是正常人在急性压力反应时，结肠内压力可升高。

这提示精神刺激可能是激燥性大肠症的非特异性诱发因素，同在其他疾病中一样，和许多病因一起致病。

## 诊断要点

1.有上述胃肠功能失常的症状及伴有全身性官能症状。 2.患者的症状常随情绪而变化。 3.全消化道摄影检查或胃镜、**直肠镜检查**正常，排除器质性病变。 三、病因病机： 1.感受外邪：六淫之中以寒、湿、暑、热为常见，又以感受湿邪致泻者尤多。

2.饮食所伤：多为饮食过量，宿食内停；或不节肥甘，呆胃滞脾；或生冷不洁，有伤脾胃。

3.情志失调：肝郁乘脾 4.体虚久病：脾虚及肾

## 治疗方式

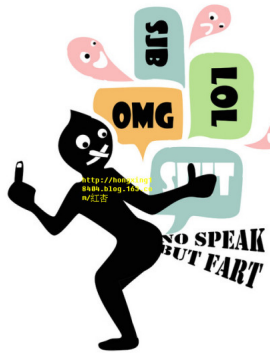

激躁性大肠症候群的概述图(张)

### 词条统计

浏览次数：247543次  
编辑次数：17次[历史版本](#)  
最近更新：w\_ou （2021-01-26）

### 突出贡献榜

qqq582311436

- |            |            |
|------------|------------|
| 1 购买域名     | 12 电竞      |
| 2 37游戏平台   | 13 sci     |
| 3 国际期货     | 14 虚拟      |
| 4 csgo电脑配置 | 15 图书      |
| 5 战队Logo设计 | 16 网络      |
| 6 自己创建个网   | 17 出版社自费   |
| 7 游戏盒子     | 18 vr消防演练  |
| 8 哈佛大学申请   | 19 价格便宜的   |
| 9 无人机反制    | 20 csgo网站开 |
| 10 网络安全培训  | 21 怎么创建小   |
| 11 亚马逊图书   | 22 供应链管理   |

金灿荣

详解2022年俄乌冲突

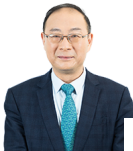

寒湿为**泄泻**的主要病理因素，**脾虚湿盛**是其发病关键。固治疗当以运脾祛湿为原则。辩证施治

- 1.**寒湿困脾**：散寒化湿，**健脾**止泻
- 2.**湿热下注**：**清热利湿**，厚肠止泻
- 3.食滞肠胃：**消食导滞**、调和脾胃
- 4.肝气乘脾：抑肝扶脾、调和脾胃
- 5.脾虚湿盛：健脾益气、运中止泻
- 6.**脾肾阳虚**：温补脾肾、固肠止泻

预防保养

播报 编辑

- 1.注意饮食卫生，起居有常
- 2.勿过食生冷、或肥甘厚腻、或饮酒无度
- 3.注意情志因素
- 4.注意保暖，切勿受湿受凉

词条图册

更多图册 >

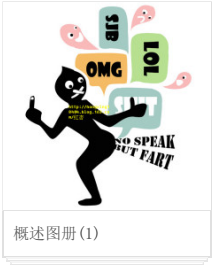

概述图册 (1)

猜你喜欢

躁郁自测--抑郁自评量表SDS，标准版  
躁郁自测，抑郁测量表，网上的测评试题 评分标准，综合心理，健康测试，心理测试，心理抑郁，全方位解读，图表分析，针对...  
bdcs.lhwljy.top

搜索发现

- 激躁性大肠症候群
- 大肠激躁症能喝酸奶吗
- 肠炎的症状
- 大肠激躁症可以自愈
- 激躁性大肠要吃药吗
- 狂躁症
- 肠梗阻症状及治疗
- 暴躁症
- 运动治好了我的肠易激
- 狂躁症吃什么药

新手上路

- 成长任务
- 编辑入门
- 编辑规则
- 本人编辑 **NEW**

我有疑问

- 内容质疑
- 在线客服
- 官方贴吧
- 意见反馈

投诉建议

- 举报不良信息
- 未通过词条申诉
- 投诉侵权信息
- 封禁查询与解封

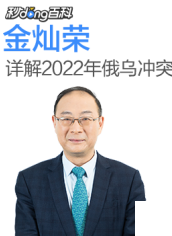

Supplement: Raw_data.zip [file Raw_data.zip]
