# Supplementary material for: Assessment of medical information on irritable bowel syndrome information in Wikipedia and Baidu Encyclopedia: comparative study
Source: PeerJ journal article supplement (doi:10.7717/peerj.17264), 2024-05-24
Supplement: Raw_data.zip [file Raw_data.zip]

Baidu

百科

肠易激综合征

进入词条

播报

编辑

收藏

赞

Baidu

百科

肠易激综合征

进入词条

全站搜索

帮助

近期有不法分子冒充百度百科官方人员，以删除词条为由威胁并敲诈相关企业。在此严正声明：百度百科是免费编辑平台，绝不存在收费代编服务，请勿上当受骗！[详情>>](#)

首页

秒懂百科

特色百科

用户

知识专题

权威合作

下载百科APP

个人中心

肠易激综合征是一个**多义词**，请在下列**义项**上选择浏览（共3个义项） | 展开 | 添加义项 +

肠易激综合征

播报

编辑

上传视频

秒懂百科

什么是肠易激综合征？

02:22

秒懂百科

肠易激综合征可防可治，三种治疗方...

05:25

★收藏

👍2411

🔗556

本词条由“[科普中国](#)”科学百科词条编写与应用工作项目 认证。

肠易激综合征（irritable bowel syndrome，IBS）是一组持续或间歇发作，以腹痛、腹胀、排便习惯和（或）大便性状改变为临床表现，而缺乏胃肠道结构和生化异常的肠道功能紊乱性疾病。罗马Ⅲ将其列为功能性肠病的一类，患者以中青年人为主，发病年龄多见于20～50岁，女性较男性多见，有家族聚集倾向，常与其他胃肠道功能紊乱性疾病如功能性消化不良并存伴发。按照大便的性状将IBS分为腹泻型、便秘型、混合型和不定型四种临床类型，我国以腹泻为主型多见。

外文名

irritable bowel syndrome

就诊科室

消化内科

多发群体

20～50岁女性

常见病因

多与精神因素、应激状态

展开

专家解读



肠易激综合征如何治疗？

对肠易激综合征的一般治疗包括建立良好的生活习惯，饮食上避免产气的食物。



科普中国

致力于权威的科学传播

本词条认证专家为



屠惠明 | 主任医师  
无锡市第四人民医院 消化内科  
审核



韩英 | 主任医师  
陆军总院 消化科

★

👤

🗨️

📢

📱

疾病概况

科普文章 (1)

科普视频

目录

1 病因

2 临床表现

3 检查

4 诊断

5 治疗

基本信息

外文名

irritable bowel syndrome

就诊科室

消化内科

多发群体

20～50岁女性

常见病因

多与精神因素、应激状态及肠功能紊乱有关

常见症状

腹痛、腹胀、腹泻、便秘、烧心、恶心、呕吐

传染性

无

病因

IBS的病因和发病机制尚不十分清楚，被认为是胃肠动力异常、内脏感觉异常、脑肠调控异常、炎症和精神心理等多种因素共同作用的结果。

1.胃肠道动力紊乱

肠道动力变化是IBS 症状发生的重要病理生理基础。以腹泻为主的IBS患者呈肠道动力亢进的表现，小肠传输时间显著缩短，结肠动力指数和高幅推进性收缩的均值和最大值均明显提高。便秘型IBS则正好相反，表现为肠道动力不足。

权威合作编辑



"科普中国"科学百科词条编

"科普中国"是为我国科普信

建设塑造的全...

什么是权威编辑

资源提供



科普中国

"科普中国"是中国科协...

提供资源类型：资源

什么是资源合作

词条统计

浏览次数: 4464651次

编辑次数: 66次

最近更新: w\_o\_u (2018-08-11)

详解2022年俄乌冲突

突出贡献榜

haodf\_hz

tougao16



https://baike.baidu.com/item/肠易激综合征/8456761?fromModule=lemma\_inlink

1/4

有异常的内脏-躯体放射痛，提示脊髓水平对内脏感觉信号处理的异常。

3.中枢感觉异常

研究表明，IBS患者其内脏疼痛的中枢通路与正常人有所不同，且腹泻型IBS与便秘型IBS之间的大脑反应区也有所不同。

4.脑-肠轴调节异常

IBS患者存在中枢神经系统对肠道传入信号的处理及对肠神经系统的调节异常。

5.肠道感染与炎症反应

研究显示，急性肠道感染后发生IBS的几率大大增高，因此肠道急性感染被认为是诱发IBS的危险因素之一。肠道感染引起的黏膜炎症反应，通透性增加及免疫功能激活与IBS发病的关系值得进一步研究。

6.精神心理因素

IBS患者常有焦虑、紧张、抑郁等心理异常。同时精神心理应激也可诱发或加重IBS症状，说明精神心理因素与IBS有密切的关系。

临床表现

播报

编辑

IBS无特异性症状，但相对于器质性胃肠疾病，具有一些特点：起病缓慢，间歇性发作；病程长但全身健康状况不受影响；症状的出现或加重常与精神因素或应激状态有关；白天明显，夜间睡眠后减轻。

1.症状

(1) **腹痛或腹部不适** 是IBS的主要症状，伴有大便次数或形状的异常，腹痛多于排便后缓解，部分病人易在进食后出现，腹痛可发生于腹部任何部位，局限性或弥漫性，疼痛性质多样。腹痛不会进行性加重，夜间睡眠后极少有痛醒者。

(2) **腹泻** ①持续性或间歇性腹泻，粪量少，呈糊状，含大量黏液；②禁食72小时后症状消失；③夜间不出现，有别于器质性疾病；④部分患者可因进食诱发；⑤患者可有腹泻与便秘交替现象。

(3) **便秘** 排便困难，大便干结，量少，可带较多黏液，便秘可间断或与腹泻相交替，常伴排便不尽感。

(4) **腹胀** 白天较重，尤其在午后，夜间睡眠后减轻。

(5) **上胃肠道症状** 近半数患者有胃烧灼感、恶心、呕吐等上胃肠道症状。

(6) **肠外症状** 背痛、头痛、心悸、尿频、尿急、性功能障碍等胃肠外表现较器质性肠病显著多见，部分病人尚有不同程度的心理精神异常表现，如焦虑、抑郁、紧张等。

2.体征

通常无阳性发现，或仅有腹部轻压痛。部分患者有多汗，脉快，血压高等自主神经失调表现，有时可于腹部触及乙状结肠曲或痛性肠襻。直肠指检可感到肛门痉挛、张力高，可有触痛。

检查

播报

编辑

旨在排除器质性疾病，多次（至少3次）大便常规培养均阴性，便隐血试验阴性，血尿常规正常，血沉正常，甲状腺、肝、胆、胰腺、肾功能正常。对于年龄40岁以上患者，除上述检查外，尚需进行结肠镜检查并进行黏膜活检以除外肠道感染性、肿瘤性疾病等。钡剂灌肠X线检查和腹部超声检查，也常用来进行排除诊断。

诊断

播报

编辑

IBS诊断标准以症状学为依据，诊断建立在排除器质性疾病的基础上，推荐采用目前国际公认的IBS罗马Ⅲ诊断标准：

反复发作的腹痛或不适（不适意味着感觉不舒服而非疼痛），最近3个月内每个月至少有3天出现症状，合并以下2条或多条：①排便后症状缓解；②发作时伴有排便频率改变；③发作时伴有大便性状（外观）改变。

诊断前症状出现至少6个月,近3个月符合以上标准。

以下症状对诊断具有支持意义，包括①排便频率异常（每周排便少于3次，或每日排便多于3次）；②粪便性状异常（干粪球或硬粪，或糊状粪/稀水粪）；③排便费力；④排便紧迫感、排便不尽、排黏液便以及腹胀。

治疗

播报

编辑

目前对IBS的治疗只限于对症处理。中华医学会消化病分会胃肠动力学组在《肠易激综合征诊断和治疗的共识意见》中提出：“治疗目的是消除患者顾虑，改善症状，提高生活质量。治疗原则是建立在良好医患关系的基础上，根据主要症状类型进行症

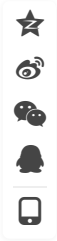

**金灿荣**  
详解2022年俄乌冲突

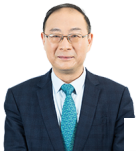



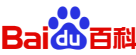



**金灿荣**  
详解2022年俄乌冲突
