# Supplementary material for: Assessment of medical information on irritable bowel syndrome information in Wikipedia and Baidu Encyclopedia: comparative study
Source: PeerJ journal article supplement (doi:10.7717/peerj.17264), 2024-05-24
Supplement: Raw_data.zip [file Raw_data.zip]

近期有不法分子冒充百度百科官方人员，以删除词条为由威胁并敲诈相关企业。在此严正声明：百度百科是免费编辑平台，绝不存在收费代编服务，请勿上当受骗！[详情>>](#)

IBS是一个**多义词**，请在下列**义项**上选择浏览（共6个义项） | 展开 | 添加义项 +

IBS

播报

编辑

讨论

上传视频

肠易激综合征

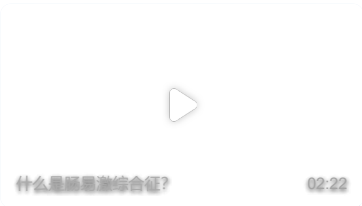

秒懂百科  
一看就懂的百科

IBS即**肠易激综合征**(Irritable Bowel Syndrome，IBS)是一种常见的功能性肠病，以腹痛或腹部不适为主要症状，排便后可改善，常伴有排便习惯改变，缺乏解释症状的形态学和生化学异常。

世界各地流行病学研究报道显示IBS是一种世界范围内的多发病。西方国家人群患病率达10%—20%，我国的一项按罗马Ⅱ标准的流行病学调查显示社区人群IBS患病率为5.7%，其中22%曾因IBS症状而就诊。

|             |                              |             |             |
|-------------|------------------------------|-------------|-------------|
| <b>西医学名</b> | 肠易激综合征                       | <b>常见症状</b> | 腹痛，腹胀，腹泻，便秘 |
| <b>外文名</b>  | irritable bowel syndrome,IBS | <b>英文简称</b> | IBS         |

|    |                                                                                              |
|----|----------------------------------------------------------------------------------------------|
| 目录 | <div><div>1 病因</div><div>2 诊断</div><div>3 肠易激综合征</div><div>4 鉴别诊断</div><div>5 治疗</div></div> |
|----|----------------------------------------------------------------------------------------------|

## 病因

一般的病因是机体应激反应与心理因素相互作用的结果，不同的个体都可能涉及遗传、环境、心理、社会和胃肠感染等因素，导致胃肠动力改变、脑—肠轴相互作用的紊乱、自主神经和激素的变化等，伴有精神障碍（如恐慌、焦虑、创伤后应激紊乱等）、**睡眠障碍**和心理应对障碍的患者，应激性生活事件常可导致症状的加重，但对心理因素与IBS之间的确切联系还不十分清楚。研究发现有1/3的IBS患者有胃肠道感染史，国内外都强调精神心理因素对IBS发病的影响，更加重视神经肽类和相关受体功能在IBS发病机制中的作用；近些年人们加强了IBS与**炎症性肠病**（IBD）之间的联系研究，少数学者甚至认为IBS为IBD的前期表现。

## 诊断

依旧以症状学作为**临床诊断**和研究。

## 肠易激综合征

1) IBS的一般标准 在最近的3个月内，每个月至少有3天出现反复发作的腹痛或不适症状，并具有下列中的2项或2项以上：

- ①排便后症状改善。
- ②伴随排便频率的改变。
- ③伴随粪便性状的改变。

★ 收藏 | 178 | 108

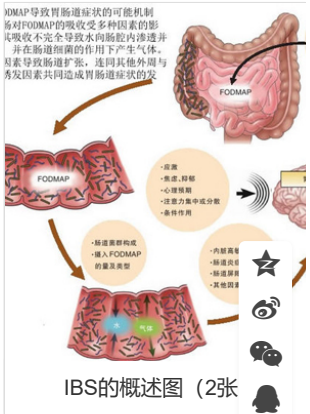

### 词条统计

浏览次数: 871420次  
编辑次数: 51次**历史版本**  
最近更新: w\_ou (2021-01-26)

### 突出贡献榜

shmily32123

- 1

aci营养师
- 2

sci文献
- 3

营养师报考资
- 4

二级心理咨询
- 5

电商怎么做
- 6

快速学日语
- 7

战队Logo设计
- 8

哈佛大学申请
- 9

哈佛大学入学
- 10

价格便宜的香
- 11

千锋教育
- 12

自己创建个
- 13

手机空号
- 14

大专生怎么
- 15

意大利留学
- 16

征文投稿
- 17

如何治脸瘫
- 18

9733游戏平
- 19

芝加哥留学
- 20

怎么成为插
- 21

华师在职研
- 22

哈佛大学宿

**金灿荣**  
详解2022年俄乌冲突

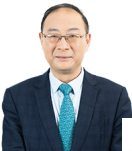

2) IBS的一般下列症状可支持诊断:

①异常的排便频率: a.每周≤3次排便或b.每天>3次排便。

②异常的粪便性状: c.块状便/硬便或d.松散便/稀水便。

③排便费力。

④排便急迫感或**排便不尽感**。

⑤排出黏液。

⑥腹胀。

3) IBS亚型 依据粪便的性状分为以下亚型:

①IBS便秘型 (IBS-C): 硬便或块状便排便比例≥25%, 稀便 (糊状便) 或水样便排便比例<25%。

②IBS腹泻型 (IBS - D): 稀便 (糊状便) 或水样便排便比例≥25%, 硬便或块状便排便比例<25%。

③混合型IBS (IBS-M): 硬便或块状便排便比例>25%, 稀便 (糊状便) 或水样便排便比例≥25%。

④不确定型IBS (IBS-U): 粪便的性状不符合上述IBS-C, D, M之中的任一标准。

在IBS分型时除需注重粪便性状外, 还应注意到患者的排便费力、急迫感和排便不尽感等症状, 在多数情况下粪便性状 (从稀水样泻到硬结便) 能够反映肠管的转运时间。

既往强调诊断的要点是: 排便后腹痛减轻, 腹痛时伴大便次数**增多**; 腹痛发作时大便变稀, 明显腹胀。现依旧在使用, 但在鉴别器质性肠病上价值有限, 需要适时作恰当的检查。确定IBS的诊断通常需要进行详细的采集病史和体格检查, 根据不同患者的需求, 有针对性地**进行**实验室和辅助检查。以便尽可能以**器质性疾病**本身解释所有的症状, 轻的器质病也可以与IBS同在。

鉴别诊断

播报

编辑

需要与IBS鉴别诊断的疾病主要有**炎症性肠病**、结直肠肿瘤, 还要注意IBS-D与**乳糖不耐受**、**小肠细菌过度生长**、寄生虫感染等鉴别。

治疗

播报

编辑

在此强调个体化的综合治疗, 即应包括精神心理行为干预治疗、饮食调整和药物治疗, 患者的治疗方法和对药物的选择应因人而异对症处理。制定罗马Ⅲ中IBS专家组对治疗的推荐意见有三类:

1、**心理治疗**

症状严重而顽固, 经一般治疗和药物治疗无效者应考虑予心理行为治疗。包括心理治疗、认知治疗、催眠疗法、生物反馈等。

2、**饮食调整**

不良的饮食习惯和膳食结构可以加剧IBS的症状。因此, 健康、平衡的饮食可有助于减轻患者的**胃肠功能紊乱**症状。IBS患者宜避免:

- ①过度饮食;
- ②大量饮酒;
- ③咖啡因;
- ④高脂饮食;
- ⑤某些具有“产气”作用的蔬菜类等;
- ⑥精加工食粮和人工食品(便秘者), 山梨醇及果糖(腹泻者);
- ⑦不耐受的食物(因不同个体而异)。

增加膳食纤维主要用于便秘为主的IBS患者, 增加纤维摄入量的方法应个体化。

3、**药物治疗**

主要针对症状显著的患者, 由于IBS患者症状复杂多变且与中枢和肠神经系统间复杂的关系, 药物都存在有效性和安全性的限制, 只能一定程度起作用。得舒特为代表胃肠选择性**钙离子拮抗剂**在各类平滑肌解痉剂中最欢迎, 在数十个国家使用; 替加色罗 (随罗马Ⅲ标准一同推出) 曾风光无限, 其有效性和安全性的限制了它的使用; 近几年对益生菌治疗很重视, 具有调节内脏敏

金灿荣

详解2022年俄乌冲突

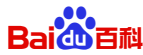

其它非药物治疗有心理专科治疗、催眠治疗、生物反馈治疗、行为治疗等，这些现虽未被罗马Ⅲ中IBS专家组对治疗的推荐，但与上述有交叉，也显出一定的疗效，需要进一步研究。

**肠易激综合征**（IBS）是一种常见的**功能性胃肠病**，以腹痛或腹部不适为主要症状，排便后可改善，常伴排便习惯及大便秘状改变，便秘和腹泻可交替出现，但缺乏可解释症状的形态学和生化异常。过去称为“**痉挛性结肠炎**”“**黏液性结肠炎**”及“**不稳定性结肠炎**”等。该病患者以20-40岁中青年居多，女性多见；具有反复发作的倾向，常迁延难愈。在药物治疗方面，西医暂无理想的药物。

**肠易激综合征**在中国的发病率在10%-20%左右，患者以中青年为主。确切的致病机制仍不明确，但精神心理因素是导致发病的重要因素，严重影响患者生活质量。患者应及时就医，可在医生指导下选用解痉剂缓解相应症状；以及止泻剂/导泻剂对应改善腹泻/便秘的症状；或通过益生菌调整肠道有益菌群，减轻腹部不适症状。调整饮食结构，改善情绪状态，才能实现逐渐康复的目的。<sup>[1]</sup>

词条图册

更多图册 >

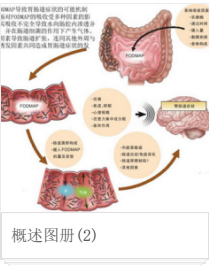

| NRN   |     |     |     |     |     |
|-------|-----|-----|-----|-----|-----|
|       | STV | HBC | RAB | IBC | TBC |
|       | YBC | RFC | QR  | LF  | IBS |
|       | YBS | SBC | BSN | SBS | SF  |
| 加盟电台  | MRO | FBC | MBS | ABC | OBC |
|       | BSS | RSK | RCC | KRY | JRT |
|       | RNB | RKC | KBC | NBC | RKK |
|       | MBC | ROK |     |     |     |
| 原加盟电台 | CRK |     |     |     |     |

参考资料

1 加强大众科学认知肠易激综合征 . 新华网[引用日期2015-04-22]

学术论文

内容来自 学术

李红缨，高丽，李宁秀. IBS-QOL专用量表在肠易激综合征患者中的运用. 《中国循证医学杂志》，2004

王世勇，陈曦，高权国. 艾灸治疗肠道易激综合征(IBS)30例临床观察. 《CNKI;WanFang》，2003

樊冬梅，刘凤斌，杨晓军等. 便秘型肠易激综合征(IBS)从脾论治的病机探微. 《吉林中医药》，2006

李敏雅. 陆维宏辨证治疗肠易激综合征(IBS)经验拾萃. 《浙江中医药大学学报》，2009

康宁宁，潘迪，谭说，付钰. 益生菌联合情志疗法对腹泻型肠易激综合征(IBS-D)患者的疗效及生存... 《VIP》，2016

查看全部 >

猜你喜欢

vvs欧洲供应商凯信贸易  
ibs德国直采，原厂报价单报价，折扣优惠，可提供报关单，欧洲工业品上游供应商，经营65家代理品牌，2486家真实成交20000...  
www.kaixinbusiness.com

德国ibs的产品，原装进口，欢迎询价  
优势供应ibs的产品，报价快，货期稳定，品质保证，质优价廉  
提供报关单和原产地证明，期待您的来电  
www.qiucheng-tech.com

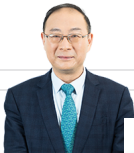



🔗 新手上路

[成长任务](#) [编辑入门](#)  
[编辑规则](#) [本人编辑](#) **NEW**

📖 我有疑问

[内容质疑](#) [在线客服](#)  
[官方贴吧](#) [意见反馈](#)

🗨️ 投诉建议

[举报不良信息](#) [未通过词条申诉](#)  
[投诉侵权信息](#) [封禁查询与解封](#)

©2022 Baidu 使用百度前必读 | [百科协议](#) | [隐私政策](#) | [百度百科合作平台](#) | 京ICP证030173号   
京公网安备11000002000001号

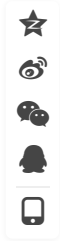



**金灿荣**  
详解2022年俄乌冲突
