# Supplementary material for: Assessment of medical information on irritable bowel syndrome information in Wikipedia and Baidu Encyclopedia: comparative study
Source: PeerJ journal article supplement (doi:10.7717/peerj.17264), 2024-05-24

 下载百科APP
 | 
  

🔗 新手上路

成长任务      编辑入门  
编辑规则      本人编辑 **NEW**

📖 我有疑问

内容质疑      在线客服  
官方贴吧      意见反馈

🗨️ 投诉建议

举报不良信息      未通过词条申诉  
投诉侵权信息      封禁查询与解封

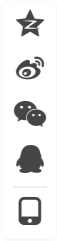

  
**金灿荣**  
详解2022年俄乌冲突



Supplement: Raw_data.zip [file Raw_data.zip]
