# Supplementary material for: Assessment of medical information on irritable bowel syndrome information in Wikipedia and Baidu Encyclopedia: comparative study
Source: PeerJ journal article supplement (doi:10.7717/peerj.17264), 2024-05-24
Supplement: Raw_data.zip [file Raw_data.zip]

Baidu百科

肠躁症

进入词条

全站搜索

帮助

近期有不法分子冒充百度百科官方人员，以删除词条为由威胁并敲诈相关企业。在此严正声明：百度百科是免费编辑平台，绝不存在收费代编服务，请勿上当受骗！[详情>>](#)

首页秒懂百科特色百科用户知识专题权威合作

下载百科APP

肠躁症

播报编辑上传视频

收藏1627

1093

肠躁症是最常见的消化系统失调，至少百分之10~15%的成人发生，大多数病例都是因为压力过大而造成，受情绪影响较大。

别名肠躁症

中医病名结肠痉挛

外文名Irritable Bowel Syndrome

英文名称：Irritable Bowel Syndrome

中文名称：肠躁症（躁性大肠症候群）

简称缩写：IBS

名词解释：又称为**结肠痉挛**，是最常见的消化系统失调，至少百分之10~15%的成人发生，约90%的病例与心理压力有关。主要症状为腹痛，肠胃不适，便秘，或下痢。近12个月内，连续或间歇性，有以上症状达12周以上。

词条图册

更多图册>

词条统计

浏览次数：90686次

编辑次数：8次[历史版本](#)

最近更新：sunnyhuman（2016-01-25）

突出贡献榜

tjh19931014

学术论文

内容来自 百度百科学术

陶诗秀. 肠躁症的饮食治疗.《vip》，2016

陶诗秀. 肠躁症的饮食治疗.《现代养生》，2016

欣欣. 肠躁症又是什么?.《健康之家》，2016

偏头痛与肠躁症有关.《vip》，2017

查看全部>

搜索发现

胶囊胃镜

胃腹胀气

肠道功能紊乱的症状

肠炎的治法

肚子胀痛快速解决办法

肠躁症

肠燥症症状

肠燥症怎么办

教师资格证考试时间

中专学校

新手上路

成长任务

编辑入门

编辑规则

本人编辑

我有疑问

内容质疑

在线客服

官方贴吧

意见反馈

投诉建议

举报不良信息

未通过词条申诉

投诉侵权信息

封禁查询与解封

金灿荣

详解2022年俄乌冲突

©2022 Baidu 使用百度前必读 | 百科协议 | 隐私政策 | 百度百科合作平台 | 京ICP证030173号

京公网安备11000002000001号

https://baike.baidu.com/item/肠躁症/86605?fromModule=search-result\_lemma

1/1
