# Supplementary material for: Assessment of medical information on irritable bowel syndrome information in Wikipedia and Baidu Encyclopedia: comparative study
Source: PeerJ. 2024 May 24;12:e17264. doi: 10.7717/peerj.17264 (PMC11129691; doi:10.7717/peerj.17264)
Supplement: Supplemental Information 2 — A and B represent two different reviews. [file peerj-12-17264-s002.xlsx]

## Sheet: DICERN
	DicernS	Score	Titile	English Titile	Dcate	Reviewer			1	2
baidu	1	4	bai-IBS	bai-IBS	1	B
baidu	2	3	bai-IBS	bai-IBS	1	B
baidu	3	3	bai-IBS	bai-IBS	1	B
baidu	4	1	bai-IBS	bai-IBS	1	B
baidu	5	1	bai-IBS	bai-IBS	1	B
baidu	6	3	bai-IBS	bai-IBS	1	B
baidu	7	2	bai-IBS	bai-IBS	1	B
baidu	8	2	bai-IBS	bai-IBS	1	B
baidu	9	3	bai-IBS	bai-IBS	1	B
baidu	10	3	bai-IBS	bai-IBS	1	B
baidu	11	1	bai-IBS	bai-IBS	1	B
baidu	12	1	bai-IBS	bai-IBS	1	B
baidu	13	1	bai-IBS	bai-IBS	1	B
baidu	14	2	bai-IBS	bai-IBS	1	B
baidu	15	3	bai-IBS	bai-IBS	1	B
baidu	16	3	bai-IBS	bai-IBS	1	B
baidu	1	4	bai-肠易激综合征	bai-Irritable bowel syndrome	1	B
baidu	2	3	bai-肠易激综合征	bai-Irritable bowel syndrome	1	B
baidu	3	3	bai-肠易激综合征	bai-Irritable bowel syndrome	1	B
baidu	4	1	bai-肠易激综合征	bai-Irritable bowel syndrome	1	B
baidu	5	1	bai-肠易激综合征	bai-Irritable bowel syndrome	1	B
baidu	6	2	bai-肠易激综合征	bai-Irritable bowel syndrome	1	B
baidu	7	2	bai-肠易激综合征	bai-Irritable bowel syndrome	1	B
baidu	8	2	bai-肠易激综合征	bai-Irritable bowel syndrome	1	B
baidu	9	3	bai-肠易激综合征	bai-Irritable bowel syndrome	1	B
baidu	10	3	bai-肠易激综合征	bai-Irritable bowel syndrome	1	B
baidu	11	3	bai-肠易激综合征	bai-Irritable bowel syndrome	1	B
baidu	12	1	bai-肠易激综合征	bai-Irritable bowel syndrome	1	B
baidu	13	1	bai-肠易激综合征	bai-Irritable bowel syndrome	1	B
baidu	14	3	bai-肠易激综合征	bai-Irritable bowel syndrome	1	B
baidu	15	3	bai-肠易激综合征	bai-Irritable bowel syndrome	1	B
baidu	16	3	bai-肠易激综合征	bai-Irritable bowel syndrome	1	B
baidu	1	5	bai-易激结肠	bai-Irritable colon	1	B
baidu	2	4	bai-易激结肠	bai-Irritable colon	1	B
baidu	3	3	bai-易激结肠	bai-Irritable colon	1	B
baidu	4	1	bai-易激结肠	bai-Irritable colon	1	B
baidu	5	1	bai-易激结肠	bai-Irritable colon	1	B
baidu	6	2	bai-易激结肠	bai-Irritable colon	1	B
baidu	7	1	bai-易激结肠	bai-Irritable colon	1	B
baidu	8	1	bai-易激结肠	bai-Irritable colon	1	B
baidu	9	3	bai-易激结肠	bai-Irritable colon	1	B
baidu	10	3	bai-易激结肠	bai-Irritable colon	1	B
baidu	11	2	bai-易激结肠	bai-Irritable colon	1	B
baidu	12	1	bai-易激结肠	bai-Irritable colon	1	B
baidu	13	1	bai-易激结肠	bai-Irritable colon	1	B
baidu	14	3	bai-易激结肠	bai-Irritable colon	1	B
baidu	15	1	bai-易激结肠	bai-Irritable colon	1	B
baidu	16	2	bai-易激结肠	bai-Irritable colon	1	B
baidu	1	4	bai-激躁性大肠症候群	bai-Irritable colorectal syndrome	1	B
baidu	2	3	bai-激躁性大肠症候群	bai-Irritable colorectal syndrome	1	B
baidu	3	3	bai-激躁性大肠症候群	bai-Irritable colorectal syndrome	1	B
baidu	4	1	bai-激躁性大肠症候群	bai-Irritable colorectal syndrome	1	B
baidu	5	1	bai-激躁性大肠症候群	bai-Irritable colorectal syndrome	1	B
baidu	6	2	bai-激躁性大肠症候群	bai-Irritable colorectal syndrome	1	B
baidu	7	1	bai-激躁性大肠症候群	bai-Irritable colorectal syndrome	1	B
baidu	8	1	bai-激躁性大肠症候群	bai-Irritable colorectal syndrome	1	B
baidu	9	2	bai-激躁性大肠症候群	bai-Irritable colorectal syndrome	1	B
baidu	10	3	bai-激躁性大肠症候群	bai-Irritable colorectal syndrome	1	B
baidu	11	1	bai-激躁性大肠症候群	bai-Irritable colorectal syndrome	1	B
baidu	12	1	bai-激躁性大肠症候群	bai-Irritable colorectal syndrome	1	B
baidu	13	2	bai-激躁性大肠症候群	bai-Irritable colorectal syndrome	1	B
baidu	14	2	bai-激躁性大肠症候群	bai-Irritable colorectal syndrome	1	B
baidu	15	1	bai-激躁性大肠症候群	bai-Irritable colorectal syndrome	1	B
baidu	16	2	bai-激躁性大肠症候群	bai-Irritable colorectal syndrome	1	B
baidu	1	3	bai-大肠激躁症	bai-Constipation-Irritable Bowel Syndrome	1	B
baidu	2	3	bai-大肠激躁症	bai-Constipation-Irritable Bowel Syndrome	1	B
baidu	3	3	bai-大肠激躁症	bai-Constipation-Irritable Bowel Syndrome	1	B
baidu	4	1	bai-大肠激躁症	bai-Constipation-Irritable Bowel Syndrome	1	B
baidu	5	1	bai-大肠激躁症	bai-Constipation-Irritable Bowel Syndrome	1	B
baidu	6	2	bai-大肠激躁症	bai-Constipation-Irritable Bowel Syndrome	1	B
baidu	7	1	bai-大肠激躁症	bai-Constipation-Irritable Bowel Syndrome	1	B
baidu	8	2	bai-大肠激躁症	bai-Constipation-Irritable Bowel Syndrome	1	B
baidu	9	1	bai-大肠激躁症	bai-Constipation-Irritable Bowel Syndrome	1	B
baidu	10	1	bai-大肠激躁症	bai-Constipation-Irritable Bowel Syndrome	1	B
baidu	11	1	bai-大肠激躁症	bai-Constipation-Irritable Bowel Syndrome	1	B
baidu	12	1	bai-大肠激躁症	bai-Constipation-Irritable Bowel Syndrome	1	B
baidu	13	1	bai-大肠激躁症	bai-Constipation-Irritable Bowel Syndrome	1	B
baidu	14	1	bai-大肠激躁症	bai-Constipation-Irritable Bowel Syndrome	1	B
baidu	15	1	bai-大肠激躁症	bai-Constipation-Irritable Bowel Syndrome	1	B
baidu	16	1	bai-大肠激躁症	bai-Constipation-Irritable Bowel Syndrome	1	B
baidu	1	2	bai-肠躁症	bai-Intestinal mania	1	B
baidu	2	1	bai-肠躁症	bai-Intestinal mania	1	B
baidu	3	1	bai-肠躁症	bai-Intestinal mania	1	B
baidu	4	1	bai-肠躁症	bai-Intestinal mania	1	B
baidu	5	1	bai-肠躁症	bai-Intestinal mania	1	B
baidu	6	1	bai-肠躁症	bai-Intestinal mania	1	B
baidu	7	1	bai-肠躁症	bai-Intestinal mania	1	B
baidu	8	1	bai-肠躁症	bai-Intestinal mania	1	B
baidu	9	1	bai-肠躁症	bai-Intestinal mania	1	B
baidu	10	1	bai-肠躁症	bai-Intestinal mania	1	B
baidu	11	1	bai-肠躁症	bai-Intestinal mania	1	B
baidu	12	1	bai-肠躁症	bai-Intestinal mania	1	B
baidu	13	1	bai-肠躁症	bai-Intestinal mania	1	B
baidu	14	1	bai-肠躁症	bai-Intestinal mania	1	B
baidu	15	1	bai-肠躁症	bai-Intestinal mania	1	B
baidu	16	1	bai-肠躁症	bai-Intestinal mania	1	B
baidu	1	5	bai-功能性胃肠病	bai-functional gastrointestinaldisorders	2	B
baidu	2	4	bai-功能性胃肠病	bai-functional gastrointestinaldisorders	2	B
baidu	3	3	bai-功能性胃肠病	bai-functional gastrointestinaldisorders	2	B
baidu	4	2	bai-功能性胃肠病	bai-functional gastrointestinaldisorders	2	B
baidu	5	2	bai-功能性胃肠病	bai-functional gastrointestinaldisorders	2	B
baidu	6	3	bai-功能性胃肠病	bai-functional gastrointestinaldisorders	2	B
baidu	7	2	bai-功能性胃肠病	bai-functional gastrointestinaldisorders	2	B
baidu	8	2	bai-功能性胃肠病	bai-functional gastrointestinaldisorders	2	B
baidu	9	2	bai-功能性胃肠病	bai-functional gastrointestinaldisorders	2	B
baidu	10	2	bai-功能性胃肠病	bai-functional gastrointestinaldisorders	2	B
baidu	11	1	bai-功能性胃肠病	bai-functional gastrointestinaldisorders	2	B
baidu	12	1	bai-功能性胃肠病	bai-functional gastrointestinaldisorders	2	B
baidu	13	1	bai-功能性胃肠病	bai-functional gastrointestinaldisorders	2	B
baidu	14	2	bai-功能性胃肠病	bai-functional gastrointestinaldisorders	2	B
baidu	15	1	bai-功能性胃肠病	bai-functional gastrointestinaldisorders	2	B
baidu	16	2	bai-功能性胃肠病	bai-functional gastrointestinaldisorders	2	B
baidu	1	5	bai-消化不良	bai-Dyspepsia	2	B
baidu	2	4	bai-消化不良	bai-Dyspepsia	2	B
baidu	3	3	bai-消化不良	bai-Dyspepsia	2	B
baidu	4	1	bai-消化不良	bai-Dyspepsia	2	B
baidu	5	1	bai-消化不良	bai-Dyspepsia	2	B
baidu	6	3	bai-消化不良	bai-Dyspepsia	2	B
baidu	7	1	bai-消化不良	bai-Dyspepsia	2	B
baidu	8	2	bai-消化不良	bai-Dyspepsia	2	B
baidu	9	4	bai-消化不良	bai-Dyspepsia	2	B
baidu	10	4	bai-消化不良	bai-Dyspepsia	2	B
baidu	11	1	bai-消化不良	bai-Dyspepsia	2	B
baidu	12	2	bai-消化不良	bai-Dyspepsia	2	B
baidu	13	2	bai-消化不良	bai-Dyspepsia	2	B
baidu	14	3	bai-消化不良	bai-Dyspepsia	2	B
baidu	15	2	bai-消化不良	bai-Dyspepsia	2	B
baidu	16	3	bai-消化不良	bai-Dyspepsia	2	B
baidu	1	5	bai-胃肠道胀气	bai-Gastrointestinal flatulence	2	B
baidu	2	4	bai-胃肠道胀气	bai-Gastrointestinal flatulence	2	B
baidu	3	2	bai-胃肠道胀气	bai-Gastrointestinal flatulence	2	B
baidu	4	2	bai-胃肠道胀气	bai-Gastrointestinal flatulence	2	B
baidu	5	3	bai-胃肠道胀气	bai-Gastrointestinal flatulence	2	B
baidu	6	2	bai-胃肠道胀气	bai-Gastrointestinal flatulence	2	B
baidu	7	1	bai-胃肠道胀气	bai-Gastrointestinal flatulence	2	B
baidu	8	1	bai-胃肠道胀气	bai-Gastrointestinal flatulence	2	B
baidu	9	4	bai-胃肠道胀气	bai-Gastrointestinal flatulence	2	B
baidu	10	4	bai-胃肠道胀气	bai-Gastrointestinal flatulence	2	B
baidu	11	1	bai-胃肠道胀气	bai-Gastrointestinal flatulence	2	B
baidu	12	1	bai-胃肠道胀气	bai-Gastrointestinal flatulence	2	B
baidu	13	2	bai-胃肠道胀气	bai-Gastrointestinal flatulence	2	B
baidu	14	3	bai-胃肠道胀气	bai-Gastrointestinal flatulence	2	B
baidu	15	1	bai-胃肠道胀气	bai-Gastrointestinal flatulence	2	B
baidu	16	3	bai-胃肠道胀气	bai-Gastrointestinal flatulence	2	B
baidu	1	3	bai-肠痉挛	bai-Enterospasm	3	B
baidu	2	3	bai-肠痉挛	bai-Enterospasm	3	B
baidu	3	2	bai-肠痉挛	bai-Enterospasm	3	B
baidu	4	1	bai-肠痉挛	bai-Enterospasm	3	B
baidu	5	1	bai-肠痉挛	bai-Enterospasm	3	B
baidu	6	2	bai-肠痉挛	bai-Enterospasm	3	B
baidu	7	1	bai-肠痉挛	bai-Enterospasm	3	B
baidu	8	1	bai-肠痉挛	bai-Enterospasm	3	B
baidu	9	3	bai-肠痉挛	bai-Enterospasm	3	B
baidu	10	2	bai-肠痉挛	bai-Enterospasm	3	B
baidu	11	1	bai-肠痉挛	bai-Enterospasm	3	B
baidu	12	1	bai-肠痉挛	bai-Enterospasm	3	B
baidu	13	1	bai-肠痉挛	bai-Enterospasm	3	B
baidu	14	3	bai-肠痉挛	bai-Enterospasm	3	B
baidu	15	1	bai-肠痉挛	bai-Enterospasm	3	B
baidu	16	2	bai-肠痉挛	bai-Enterospasm	3	B
baidu	1	2	bai-痉挛性结肠炎	bai-Spasmodic colitis	3	B
baidu	2	1	bai-痉挛性结肠炎	bai-Spasmodic colitis	3	B
baidu	3	1	bai-痉挛性结肠炎	bai-Spasmodic colitis	3	B
baidu	4	1	bai-痉挛性结肠炎	bai-Spasmodic colitis	3	B
baidu	5	1	bai-痉挛性结肠炎	bai-Spasmodic colitis	3	B
baidu	6	2	bai-痉挛性结肠炎	bai-Spasmodic colitis	3	B
baidu	7	1	bai-痉挛性结肠炎	bai-Spasmodic colitis	3	B
baidu	8	1	bai-痉挛性结肠炎	bai-Spasmodic colitis	3	B
baidu	9	1	bai-痉挛性结肠炎	bai-Spasmodic colitis	3	B
baidu	10	1	bai-痉挛性结肠炎	bai-Spasmodic colitis	3	B
baidu	11	1	bai-痉挛性结肠炎	bai-Spasmodic colitis	3	B
baidu	12	1	bai-痉挛性结肠炎	bai-Spasmodic colitis	3	B
baidu	13	1	bai-痉挛性结肠炎	bai-Spasmodic colitis	3	B
baidu	14	1	bai-痉挛性结肠炎	bai-Spasmodic colitis	3	B
baidu	15	1	bai-痉挛性结肠炎	bai-Spasmodic colitis	3	B
baidu	16	1	bai-痉挛性结肠炎	bai-Spasmodic colitis	3	B
baidu	1	5	bai-过敏性结肠炎	bai-Allergic colitis	3	B
baidu	2	4	bai-过敏性结肠炎	bai-Allergic colitis	3	B
baidu	3	4	bai-过敏性结肠炎	bai-Allergic colitis	3	B
baidu	4	1	bai-过敏性结肠炎	bai-Allergic colitis	3	B
baidu	5	1	bai-过敏性结肠炎	bai-Allergic colitis	3	B
baidu	6	3	bai-过敏性结肠炎	bai-Allergic colitis	3	B
baidu	7	1	bai-过敏性结肠炎	bai-Allergic colitis	3	B
baidu	8	2	bai-过敏性结肠炎	bai-Allergic colitis	3	B
baidu	9	3	bai-过敏性结肠炎	bai-Allergic colitis	3	B
baidu	10	2	bai-过敏性结肠炎	bai-Allergic colitis	3	B
baidu	11	1	bai-过敏性结肠炎	bai-Allergic colitis	3	B
baidu	12	1	bai-过敏性结肠炎	bai-Allergic colitis	3	B
baidu	13	2	bai-过敏性结肠炎	bai-Allergic colitis	3	B
baidu	14	4	bai-过敏性结肠炎	bai-Allergic colitis	3	B
baidu	15	1	bai-过敏性结肠炎	bai-Allergic colitis	3	B
baidu	16	3	bai-过敏性结肠炎	bai-Allergic colitis	3	B
baidu	1	5	bai-便秘	bai-Constipation	3	B
baidu	2	4	bai-便秘	bai-Constipation	3	B
baidu	3	2	bai-便秘	bai-Constipation	3	B
baidu	4	1	bai-便秘	bai-Constipation	3	B
baidu	5	1	bai-便秘	bai-Constipation	3	B
baidu	6	3	bai-便秘	bai-Constipation	3	B
baidu	7	1	bai-便秘	bai-Constipation	3	B
baidu	8	1	bai-便秘	bai-Constipation	3	B
baidu	9	2	bai-便秘	bai-Constipation	3	B
baidu	10	3	bai-便秘	bai-Constipation	3	B
baidu	11	2	bai-便秘	bai-Constipation	3	B
baidu	12	1	bai-便秘	bai-Constipation	3	B
baidu	13	1	bai-便秘	bai-Constipation	3	B
baidu	14	3	bai-便秘	bai-Constipation	3	B
baidu	15	1	bai-便秘	bai-Constipation	3	B
baidu	16	2	bai-便秘	bai-Constipation	3	B
baidu	1	5	bai-功能性便秘	bai-Functional constipation	3	B
baidu	2	4	bai-功能性便秘	bai-Functional constipation	3	B
baidu	3	3	bai-功能性便秘	bai-Functional constipation	3	B
baidu	4	2	bai-功能性便秘	bai-Functional constipation	3	B
baidu	5	2	bai-功能性便秘	bai-Functional constipation	3	B
baidu	6	3	bai-功能性便秘	bai-Functional constipation	3	B
baidu	7	2	bai-功能性便秘	bai-Functional constipation	3	B
baidu	8	1	bai-功能性便秘	bai-Functional constipation	3	B
baidu	9	5	bai-功能性便秘	bai-Functional constipation	3	B
baidu	10	4	bai-功能性便秘	bai-Functional constipation	3	B
baidu	11	3	bai-功能性便秘	bai-Functional constipation	3	B
baidu	12	2	bai-功能性便秘	bai-Functional constipation	3	B
baidu	13	3	bai-功能性便秘	bai-Functional constipation	3	B
baidu	14	4	bai-功能性便秘	bai-Functional constipation	3	B
baidu	15	1	bai-功能性便秘	bai-Functional constipation	3	B
baidu	16	3	bai-功能性便秘	bai-Functional constipation	3	B
baidu	1	4	bai-弛缓性便秘	bai-Flaccid constipation	3	B
baidu	2	4	bai-弛缓性便秘	bai-Flaccid constipation	3	B
baidu	3	3	bai-弛缓性便秘	bai-Flaccid constipation	3	B
baidu	4	3	bai-弛缓性便秘	bai-Flaccid constipation	3	B
baidu	5	3	bai-弛缓性便秘	bai-Flaccid constipation	3	B
baidu	6	3	bai-弛缓性便秘	bai-Flaccid constipation	3	B
baidu	7	1	bai-弛缓性便秘	bai-Flaccid constipation	3	B
baidu	8	1	bai-弛缓性便秘	bai-Flaccid constipation	3	B
baidu	9	4	bai-弛缓性便秘	bai-Flaccid constipation	3	B
baidu	10	3	bai-弛缓性便秘	bai-Flaccid constipation	3	B
baidu	11	3	bai-弛缓性便秘	bai-Flaccid constipation	3	B
baidu	12	2	bai-弛缓性便秘	bai-Flaccid constipation	3	B
baidu	13	3	bai-弛缓性便秘	bai-Flaccid constipation	3	B
baidu	14	3	bai-弛缓性便秘	bai-Flaccid constipation	3	B
baidu	15	1	bai-弛缓性便秘	bai-Flaccid constipation	3	B
baidu	16	3	bai-弛缓性便秘	bai-Flaccid constipation	3	B
baidu	1	5	bai-慢性功能性便秘	bai-Chronic functional constipation	3	B
baidu	2	5	bai-慢性功能性便秘	bai-Chronic functional constipation	3	B
baidu	3	5	bai-慢性功能性便秘	bai-Chronic functional constipation	3	B
baidu	4	3	bai-慢性功能性便秘	bai-Chronic functional constipation	3	B
baidu	5	2	bai-慢性功能性便秘	bai-Chronic functional constipation	3	B
baidu	6	4	bai-慢性功能性便秘	bai-Chronic functional constipation	3	B
baidu	7	3	bai-慢性功能性便秘	bai-Chronic functional constipation	3	B
baidu	8	1	bai-慢性功能性便秘	bai-Chronic functional constipation	3	B
baidu	9	5	bai-慢性功能性便秘	bai-Chronic functional constipation	3	B
baidu	10	4	bai-慢性功能性便秘	bai-Chronic functional constipation	3	B
baidu	11	3	bai-慢性功能性便秘	bai-Chronic functional constipation	3	B
baidu	12	3	bai-慢性功能性便秘	bai-Chronic functional constipation	3	B
baidu	13	4	bai-慢性功能性便秘	bai-Chronic functional constipation	3	B
baidu	14	5	bai-慢性功能性便秘	bai-Chronic functional constipation	3	B
baidu	15	1	bai-慢性功能性便秘	bai-Chronic functional constipation	3	B
baidu	16	4	bai-慢性功能性便秘	bai-Chronic functional constipation	3	B
baidu	1	5	bai-功能性腹泻	bai-Functional diarrhea	3	B
baidu	2	4	bai-功能性腹泻	bai-Functional diarrhea	3	B
baidu	3	2	bai-功能性腹泻	bai-Functional diarrhea	3	B
baidu	4	1	bai-功能性腹泻	bai-Functional diarrhea	3	B
baidu	5	1	bai-功能性腹泻	bai-Functional diarrhea	3	B
baidu	6	2	bai-功能性腹泻	bai-Functional diarrhea	3	B
baidu	7	1	bai-功能性腹泻	bai-Functional diarrhea	3	B
baidu	8	1	bai-功能性腹泻	bai-Functional diarrhea	3	B
baidu	9	2	bai-功能性腹泻	bai-Functional diarrhea	3	B
baidu	10	2	bai-功能性腹泻	bai-Functional diarrhea	3	B
baidu	11	1	bai-功能性腹泻	bai-Functional diarrhea	3	B
baidu	12	1	bai-功能性腹泻	bai-Functional diarrhea	3	B
baidu	13	2	bai-功能性腹泻	bai-Functional diarrhea	3	B
baidu	14	3	bai-功能性腹泻	bai-Functional diarrhea	3	B
baidu	15	1	bai-功能性腹泻	bai-Functional diarrhea	3	B
baidu	16	2	bai-功能性腹泻	bai-Functional diarrhea	3	B
baidu	1	2	bai-神经源性肠道	bai-Neurogenic bowel	3	B
baidu	2	2	bai-神经源性肠道	bai-Neurogenic bowel	3	B
baidu	3	1	bai-神经源性肠道	bai-Neurogenic bowel	3	B
baidu	4	3	bai-神经源性肠道	bai-Neurogenic bowel	3	B
baidu	5	3	bai-神经源性肠道	bai-Neurogenic bowel	3	B
baidu	6	2	bai-神经源性肠道	bai-Neurogenic bowel	3	B
baidu	7	1	bai-神经源性肠道	bai-Neurogenic bowel	3	B
baidu	8	1	bai-神经源性肠道	bai-Neurogenic bowel	3	B
baidu	9	1	bai-神经源性肠道	bai-Neurogenic bowel	3	B
baidu	10	1	bai-神经源性肠道	bai-Neurogenic bowel	3	B
baidu	11	1	bai-神经源性肠道	bai-Neurogenic bowel	3	B
baidu	12	1	bai-神经源性肠道	bai-Neurogenic bowel	3	B
baidu	13	1	bai-神经源性肠道	bai-Neurogenic bowel	3	B
baidu	14	1	bai-神经源性肠道	bai-Neurogenic bowel	3	B
baidu	15	1	bai-神经源性肠道	bai-Neurogenic bowel	3	B
baidu	16	1	bai-神经源性肠道	bai-Neurogenic bowel	3	B
baidu	1	4	bai-脾曲综合征	bai-Splenic flexure syndrome	3	B
baidu	2	2	bai-脾曲综合征	bai-Splenic flexure syndrome	3	B
baidu	3	2	bai-脾曲综合征	bai-Splenic flexure syndrome	3	B
baidu	4	1	bai-脾曲综合征	bai-Splenic flexure syndrome	3	B
baidu	5	1	bai-脾曲综合征	bai-Splenic flexure syndrome	3	B
baidu	6	2	bai-脾曲综合征	bai-Splenic flexure syndrome	3	B
baidu	7	1	bai-脾曲综合征	bai-Splenic flexure syndrome	3	B
baidu	8	1	bai-脾曲综合征	bai-Splenic flexure syndrome	3	B
baidu	9	2	bai-脾曲综合征	bai-Splenic flexure syndrome	3	B
baidu	10	1	bai-脾曲综合征	bai-Splenic flexure syndrome	3	B
baidu	11	1	bai-脾曲综合征	bai-Splenic flexure syndrome	3	B
baidu	12	1	bai-脾曲综合征	bai-Splenic flexure syndrome	3	B
baidu	13	1	bai-脾曲综合征	bai-Splenic flexure syndrome	3	B
baidu	14	1	bai-脾曲综合征	bai-Splenic flexure syndrome	3	B
baidu	15	1	bai-脾曲综合征	bai-Splenic flexure syndrome	3	B
baidu	16	2	bai-脾曲综合征	bai-Splenic flexure syndrome	3	B
baidu	1	2	bai-小肠菌群过度生长综合征	bai-Enteric bacterial over-growth syndrome	3	B
baidu	2	3	bai-小肠菌群过度生长综合征	bai-Enteric bacterial over-growth syndrome	3	B
baidu	3	1	bai-小肠菌群过度生长综合征	bai-Enteric bacterial over-growth syndrome	3	B
baidu	4	3	bai-小肠菌群过度生长综合征	bai-Enteric bacterial over-growth syndrome	3	B
baidu	5	3	bai-小肠菌群过度生长综合征	bai-Enteric bacterial over-growth syndrome	3	B
baidu	6	2	bai-小肠菌群过度生长综合征	bai-Enteric bacterial over-growth syndrome	3	B
baidu	7	1	bai-小肠菌群过度生长综合征	bai-Enteric bacterial over-growth syndrome	3	B
baidu	8	1	bai-小肠菌群过度生长综合征	bai-Enteric bacterial over-growth syndrome	3	B
baidu	9	1	bai-小肠菌群过度生长综合征	bai-Enteric bacterial over-growth syndrome	3	B
baidu	10	1	bai-小肠菌群过度生长综合征	bai-Enteric bacterial over-growth syndrome	3	B
baidu	11	1	bai-小肠菌群过度生长综合征	bai-Enteric bacterial over-growth syndrome	3	B
baidu	12	1	bai-小肠菌群过度生长综合征	bai-Enteric bacterial over-growth syndrome	3	B
baidu	13	1	bai-小肠菌群过度生长综合征	bai-Enteric bacterial over-growth syndrome	3	B
baidu	14	1	bai-小肠菌群过度生长综合征	bai-Enteric bacterial over-growth syndrome	3	B
baidu	15	1	bai-小肠菌群过度生长综合征	bai-Enteric bacterial over-growth syndrome	3	B
baidu	16	1	bai-小肠菌群过度生长综合征	bai-Enteric bacterial over-growth syndrome	3	B
baidu	1	5	bai-肠道菌群失调	bai-Intestinal bacilli illness	3	B
baidu	2	3	bai-肠道菌群失调	bai-Intestinal bacilli illness	3	B
baidu	3	3	bai-肠道菌群失调	bai-Intestinal bacilli illness	3	B
baidu	4	3	bai-肠道菌群失调	bai-Intestinal bacilli illness	3	B
baidu	5	3	bai-肠道菌群失调	bai-Intestinal bacilli illness	3	B
baidu	6	3	bai-肠道菌群失调	bai-Intestinal bacilli illness	3	B
baidu	7	3	bai-肠道菌群失调	bai-Intestinal bacilli illness	3	B
baidu	8	1	bai-肠道菌群失调	bai-Intestinal bacilli illness	3	B
baidu	9	4	bai-肠道菌群失调	bai-Intestinal bacilli illness	3	B
baidu	10	4	bai-肠道菌群失调	bai-Intestinal bacilli illness	3	B
baidu	11	1	bai-肠道菌群失调	bai-Intestinal bacilli illness	3	B
baidu	12	2	bai-肠道菌群失调	bai-Intestinal bacilli illness	3	B
baidu	13	4	bai-肠道菌群失调	bai-Intestinal bacilli illness	3	B
baidu	14	4	bai-肠道菌群失调	bai-Intestinal bacilli illness	3	B
baidu	15	1	bai-肠道菌群失调	bai-Intestinal bacilli illness	3	B
baidu	16	3	bai-肠道菌群失调	bai-Intestinal bacilli illness	3	B
baidu	1	5	bai-痉挛性肛门直肠痛	bai-Proctalgia fugax	4	B
baidu	2	5	bai-痉挛性肛门直肠痛	bai-Proctalgia fugax	4	B
baidu	3	4	bai-痉挛性肛门直肠痛	bai-Proctalgia fugax	4	B
baidu	4	1	bai-痉挛性肛门直肠痛	bai-Proctalgia fugax	4	B
baidu	5	1	bai-痉挛性肛门直肠痛	bai-Proctalgia fugax	4	B
baidu	6	4	bai-痉挛性肛门直肠痛	bai-Proctalgia fugax	4	B
baidu	7	1	bai-痉挛性肛门直肠痛	bai-Proctalgia fugax	4	B
baidu	8	2	bai-痉挛性肛门直肠痛	bai-Proctalgia fugax	4	B
baidu	9	5	bai-痉挛性肛门直肠痛	bai-Proctalgia fugax	4	B
baidu	10	5	bai-痉挛性肛门直肠痛	bai-Proctalgia fugax	4	B
baidu	11	1	bai-痉挛性肛门直肠痛	bai-Proctalgia fugax	4	B
baidu	12	2	bai-痉挛性肛门直肠痛	bai-Proctalgia fugax	4	B
baidu	13	3	bai-痉挛性肛门直肠痛	bai-Proctalgia fugax	4	B
baidu	14	5	bai-痉挛性肛门直肠痛	bai-Proctalgia fugax	4	B
baidu	15	1	bai-痉挛性肛门直肠痛	bai-Proctalgia fugax	4	B
baidu	16	4	bai-痉挛性肛门直肠痛	bai-Proctalgia fugax	4	B
baidu	1	3	bai-肠管扩张	bai-Dilatation of intestine	4	B
baidu	2	3	bai-肠管扩张	bai-Dilatation of intestine	4	B
baidu	3	2	bai-肠管扩张	bai-Dilatation of intestine	4	B
baidu	4	1	bai-肠管扩张	bai-Dilatation of intestine	4	B
baidu	5	1	bai-肠管扩张	bai-Dilatation of intestine	4	B
baidu	6	2	bai-肠管扩张	bai-Dilatation of intestine	4	B
baidu	7	1	bai-肠管扩张	bai-Dilatation of intestine	4	B
baidu	8	1	bai-肠管扩张	bai-Dilatation of intestine	4	B
baidu	9	3	bai-肠管扩张	bai-Dilatation of intestine	4	B
baidu	10	2	bai-肠管扩张	bai-Dilatation of intestine	4	B
baidu	11	1	bai-肠管扩张	bai-Dilatation of intestine	4	B
baidu	12	1	bai-肠管扩张	bai-Dilatation of intestine	4	B
baidu	13	2	bai-肠管扩张	bai-Dilatation of intestine	4	B
baidu	14	3	bai-肠管扩张	bai-Dilatation of intestine	4	B
baidu	15	1	bai-肠管扩张	bai-Dilatation of intestine	4	B
baidu	16	2	bai-肠管扩张	bai-Dilatation of intestine	4	B
wiki	1	5	wiki-Irritable bowel syndrome	wiki-Irritable bowel syndrome	1	B
wiki	2	5	wiki-Irritable bowel syndrome	wiki-Irritable bowel syndrome	1	B
wiki	3	4	wiki-Irritable bowel syndrome	wiki-Irritable bowel syndrome	1	B
wiki	4	5	wiki-Irritable bowel syndrome	wiki-Irritable bowel syndrome	1	B
wiki	5	5	wiki-Irritable bowel syndrome	wiki-Irritable bowel syndrome	1	B
wiki	6	5	wiki-Irritable bowel syndrome	wiki-Irritable bowel syndrome	1	B
wiki	7	5	wiki-Irritable bowel syndrome	wiki-Irritable bowel syndrome	1	B
wiki	8	5	wiki-Irritable bowel syndrome	wiki-Irritable bowel syndrome	1	B
wiki	9	5	wiki-Irritable bowel syndrome	wiki-Irritable bowel syndrome	1	B
wiki	10	5	wiki-Irritable bowel syndrome	wiki-Irritable bowel syndrome	1	B
wiki	11	3	wiki-Irritable bowel syndrome	wiki-Irritable bowel syndrome	1	B
wiki	12	2	wiki-Irritable bowel syndrome	wiki-Irritable bowel syndrome	1	B
wiki	13	3	wiki-Irritable bowel syndrome	wiki-Irritable bowel syndrome	1	B
wiki	14	5	wiki-Irritable bowel syndrome	wiki-Irritable bowel syndrome	1	B
wiki	15	3	wiki-Irritable bowel syndrome	wiki-Irritable bowel syndrome	1	B
wiki	16	5	wiki-Irritable bowel syndrome	wiki-Irritable bowel syndrome	1	B
wiki	1	5	wiki-Indigestion	wiki-Indigestion	2	B
wiki	2	5	wiki-Indigestion	wiki-Indigestion	2	B
wiki	3	5	wiki-Indigestion	wiki-Indigestion	2	B
wiki	4	5	wiki-Indigestion	wiki-Indigestion	2	B
wiki	5	5	wiki-Indigestion	wiki-Indigestion	2	B
wiki	6	5	wiki-Indigestion	wiki-Indigestion	2	B
wiki	7	4	wiki-Indigestion	wiki-Indigestion	2	B
wiki	8	4	wiki-Indigestion	wiki-Indigestion	2	B
wiki	9	5	wiki-Indigestion	wiki-Indigestion	2	B
wiki	10	4	wiki-Indigestion	wiki-Indigestion	2	B
wiki	11	3	wiki-Indigestion	wiki-Indigestion	2	B
wiki	12	2	wiki-Indigestion	wiki-Indigestion	2	B
wiki	13	3	wiki-Indigestion	wiki-Indigestion	2	B
wiki	14	5	wiki-Indigestion	wiki-Indigestion	2	B
wiki	15	1	wiki-Indigestion	wiki-Indigestion	2	B
wiki	16	5	wiki-Indigestion	wiki-Indigestion	2	B
wiki	1	3	wiki-Functional gastrointetinal disorder	wiki-Functional gastrointetinal disorder	3	B
wiki	2	4	wiki-Functional gastrointetinal disorder	wiki-Functional gastrointetinal disorder	3	B
wiki	3	3	wiki-Functional gastrointetinal disorder	wiki-Functional gastrointetinal disorder	3	B
wiki	4	5	wiki-Functional gastrointetinal disorder	wiki-Functional gastrointetinal disorder	3	B
wiki	5	5	wiki-Functional gastrointetinal disorder	wiki-Functional gastrointetinal disorder	3	B
wiki	6	4	wiki-Functional gastrointetinal disorder	wiki-Functional gastrointetinal disorder	3	B
wiki	7	4	wiki-Functional gastrointetinal disorder	wiki-Functional gastrointetinal disorder	3	B
wiki	8	1	wiki-Functional gastrointetinal disorder	wiki-Functional gastrointetinal disorder	3	B
wiki	9	1	wiki-Functional gastrointetinal disorder	wiki-Functional gastrointetinal disorder	3	B
wiki	10	1	wiki-Functional gastrointetinal disorder	wiki-Functional gastrointetinal disorder	3	B
wiki	11	1	wiki-Functional gastrointetinal disorder	wiki-Functional gastrointetinal disorder	3	B
wiki	12	1	wiki-Functional gastrointetinal disorder	wiki-Functional gastrointetinal disorder	3	B
wiki	13	1	wiki-Functional gastrointetinal disorder	wiki-Functional gastrointetinal disorder	3	B
wiki	14	1	wiki-Functional gastrointetinal disorder	wiki-Functional gastrointetinal disorder	3	B
wiki	15	1	wiki-Functional gastrointetinal disorder	wiki-Functional gastrointetinal disorder	3	B
wiki	16	2	wiki-Functional gastrointetinal disorder	wiki-Functional gastrointetinal disorder	3	B
wiki	1	5	wiki-Constipation	wiki-Constipation	3	B
wiki	2	5	wiki-Constipation	wiki-Constipation	3	B
wiki	3	5	wiki-Constipation	wiki-Constipation	3	B
wiki	4	5	wiki-Constipation	wiki-Constipation	3	B
wiki	5	5	wiki-Constipation	wiki-Constipation	3	B
wiki	6	5	wiki-Constipation	wiki-Constipation	3	B
wiki	7	3	wiki-Constipation	wiki-Constipation	3	B
wiki	8	3	wiki-Constipation	wiki-Constipation	3	B
wiki	9	5	wiki-Constipation	wiki-Constipation	3	B
wiki	10	5	wiki-Constipation	wiki-Constipation	3	B
wiki	11	4	wiki-Constipation	wiki-Constipation	3	B
wiki	12	4	wiki-Constipation	wiki-Constipation	3	B
wiki	13	3	wiki-Constipation	wiki-Constipation	3	B
wiki	14	5	wiki-Constipation	wiki-Constipation	3	B
wiki	15	1	wiki-Constipation	wiki-Constipation	3	B
wiki	16	5	wiki-Constipation	wiki-Constipation	3	B
wiki	1	4	wiki-Functional constipation	wiki-Functional constipation	3	B
wiki	2	4	wiki-Functional constipation	wiki-Functional constipation	3	B
wiki	3	2	wiki-Functional constipation	wiki-Functional constipation	3	B
wiki	4	5	wiki-Functional constipation	wiki-Functional constipation	3	B
wiki	5	5	wiki-Functional constipation	wiki-Functional constipation	3	B
wiki	6	3	wiki-Functional constipation	wiki-Functional constipation	3	B
wiki	7	3	wiki-Functional constipation	wiki-Functional constipation	3	B
wiki	8	1	wiki-Functional constipation	wiki-Functional constipation	3	B
wiki	9	2	wiki-Functional constipation	wiki-Functional constipation	3	B
wiki	10	1	wiki-Functional constipation	wiki-Functional constipation	3	B
wiki	11	1	wiki-Functional constipation	wiki-Functional constipation	3	B
wiki	12	1	wiki-Functional constipation	wiki-Functional constipation	3	B
wiki	13	1	wiki-Functional constipation	wiki-Functional constipation	3	B
wiki	14	1	wiki-Functional constipation	wiki-Functional constipation	3	B
wiki	15	1	wiki-Functional constipation	wiki-Functional constipation	3	B
wiki	16	2	wiki-Functional constipation	wiki-Functional constipation	3	B
wiki	1	4	wiki-Neurogenic bowel dusfunction	wiki-Neurogenic bowel dusfunction	3	B
wiki	2	4	wiki-Neurogenic bowel dusfunction	wiki-Neurogenic bowel dusfunction	3	B
wiki	3	3	wiki-Neurogenic bowel dusfunction	wiki-Neurogenic bowel dusfunction	3	B
wiki	4	5	wiki-Neurogenic bowel dusfunction	wiki-Neurogenic bowel dusfunction	3	B
wiki	5	5	wiki-Neurogenic bowel dusfunction	wiki-Neurogenic bowel dusfunction	3	B
wiki	6	3	wiki-Neurogenic bowel dusfunction	wiki-Neurogenic bowel dusfunction	3	B
wiki	7	3	wiki-Neurogenic bowel dusfunction	wiki-Neurogenic bowel dusfunction	3	B
wiki	8	2	wiki-Neurogenic bowel dusfunction	wiki-Neurogenic bowel dusfunction	3	B
wiki	9	3	wiki-Neurogenic bowel dusfunction	wiki-Neurogenic bowel dusfunction	3	B
wiki	10	1	wiki-Neurogenic bowel dusfunction	wiki-Neurogenic bowel dusfunction	3	B
wiki	11	1	wiki-Neurogenic bowel dusfunction	wiki-Neurogenic bowel dusfunction	3	B
wiki	12	1	wiki-Neurogenic bowel dusfunction	wiki-Neurogenic bowel dusfunction	3	B
wiki	13	2	wiki-Neurogenic bowel dusfunction	wiki-Neurogenic bowel dusfunction	3	B
wiki	14	2	wiki-Neurogenic bowel dusfunction	wiki-Neurogenic bowel dusfunction	3	B
wiki	15	1	wiki-Neurogenic bowel dusfunction	wiki-Neurogenic bowel dusfunction	3	B
wiki	16	3	wiki-Neurogenic bowel dusfunction	wiki-Neurogenic bowel dusfunction	3	B
wiki	1	5	wiki-Intestinal malrotation	wiki-Intestinal malrotation	3	B
wiki	2	5	wiki-Intestinal malrotation	wiki-Intestinal malrotation	3	B
wiki	3	3	wiki-Intestinal malrotation	wiki-Intestinal malrotation	3	B
wiki	4	5	wiki-Intestinal malrotation	wiki-Intestinal malrotation	3	B
wiki	5	5	wiki-Intestinal malrotation	wiki-Intestinal malrotation	3	B
wiki	6	4	wiki-Intestinal malrotation	wiki-Intestinal malrotation	3	B
wiki	7	5	wiki-Intestinal malrotation	wiki-Intestinal malrotation	3	B
wiki	8	1	wiki-Intestinal malrotation	wiki-Intestinal malrotation	3	B
wiki	9	3	wiki-Intestinal malrotation	wiki-Intestinal malrotation	3	B
wiki	10	4	wiki-Intestinal malrotation	wiki-Intestinal malrotation	3	B
wiki	11	3	wiki-Intestinal malrotation	wiki-Intestinal malrotation	3	B
wiki	12	2	wiki-Intestinal malrotation	wiki-Intestinal malrotation	3	B
wiki	13	2	wiki-Intestinal malrotation	wiki-Intestinal malrotation	3	B
wiki	14	2	wiki-Intestinal malrotation	wiki-Intestinal malrotation	3	B
wiki	15	1	wiki-Intestinal malrotation	wiki-Intestinal malrotation	3	B
wiki	16	3	wiki-Intestinal malrotation	wiki-Intestinal malrotation	3	B
wiki	1	5	wiki-Dysbiosis	wiki-Dysbiosis	3	B
wiki	2	5	wiki-Dysbiosis	wiki-Dysbiosis	3	B
wiki	3	4	wiki-Dysbiosis	wiki-Dysbiosis	3	B
wiki	4	5	wiki-Dysbiosis	wiki-Dysbiosis	3	B
wiki	5	5	wiki-Dysbiosis	wiki-Dysbiosis	3	B
wiki	6	5	wiki-Dysbiosis	wiki-Dysbiosis	3	B
wiki	7	5	wiki-Dysbiosis	wiki-Dysbiosis	3	B
wiki	8	4	wiki-Dysbiosis	wiki-Dysbiosis	3	B
wiki	9	5	wiki-Dysbiosis	wiki-Dysbiosis	3	B
wiki	10	5	wiki-Dysbiosis	wiki-Dysbiosis	3	B
wiki	11	5	wiki-Dysbiosis	wiki-Dysbiosis	3	B
wiki	12	3	wiki-Dysbiosis	wiki-Dysbiosis	3	B
wiki	13	4	wiki-Dysbiosis	wiki-Dysbiosis	3	B
wiki	14	5	wiki-Dysbiosis	wiki-Dysbiosis	3	B
wiki	15	1	wiki-Dysbiosis	wiki-Dysbiosis	3	B
wiki	16	5	wiki-Dysbiosis	wiki-Dysbiosis	3	B
wiki	1	5	wiki-Small intestinal bacterial overgrowth	wiki-Small intestinal bacterial overgrowth	3	B
wiki	2	5	wiki-Small intestinal bacterial overgrowth	wiki-Small intestinal bacterial overgrowth	3	B
wiki	3	4	wiki-Small intestinal bacterial overgrowth	wiki-Small intestinal bacterial overgrowth	3	B
wiki	4	5	wiki-Small intestinal bacterial overgrowth	wiki-Small intestinal bacterial overgrowth	3	B
wiki	5	5	wiki-Small intestinal bacterial overgrowth	wiki-Small intestinal bacterial overgrowth	3	B
wiki	6	5	wiki-Small intestinal bacterial overgrowth	wiki-Small intestinal bacterial overgrowth	3	B
wiki	7	5	wiki-Small intestinal bacterial overgrowth	wiki-Small intestinal bacterial overgrowth	3	B
wiki	8	4	wiki-Small intestinal bacterial overgrowth	wiki-Small intestinal bacterial overgrowth	3	B
wiki	9	5	wiki-Small intestinal bacterial overgrowth	wiki-Small intestinal bacterial overgrowth	3	B
wiki	10	5	wiki-Small intestinal bacterial overgrowth	wiki-Small intestinal bacterial overgrowth	3	B
wiki	11	4	wiki-Small intestinal bacterial overgrowth	wiki-Small intestinal bacterial overgrowth	3	B
wiki	12	3	wiki-Small intestinal bacterial overgrowth	wiki-Small intestinal bacterial overgrowth	3	B
wiki	13	4	wiki-Small intestinal bacterial overgrowth	wiki-Small intestinal bacterial overgrowth	3	B
wiki	14	5	wiki-Small intestinal bacterial overgrowth	wiki-Small intestinal bacterial overgrowth	3	B
wiki	15	1	wiki-Small intestinal bacterial overgrowth	wiki-Small intestinal bacterial overgrowth	3	B
wiki	16	5	wiki-Small intestinal bacterial overgrowth	wiki-Small intestinal bacterial overgrowth	3	B
wiki	1	5	wiki-Proctalgia fugax	wiki-Proctalgia fugax	4	B
wiki	2	4	wiki-Proctalgia fugax	wiki-Proctalgia fugax	4	B
wiki	3	4	wiki-Proctalgia fugax	wiki-Proctalgia fugax	4	B
wiki	4	5	wiki-Proctalgia fugax	wiki-Proctalgia fugax	4	B
wiki	5	5	wiki-Proctalgia fugax	wiki-Proctalgia fugax	4	B
wiki	6	4	wiki-Proctalgia fugax	wiki-Proctalgia fugax	4	B
wiki	7	5	wiki-Proctalgia fugax	wiki-Proctalgia fugax	4	B
wiki	8	5	wiki-Proctalgia fugax	wiki-Proctalgia fugax	4	B
wiki	9	5	wiki-Proctalgia fugax	wiki-Proctalgia fugax	4	B
wiki	10	3	wiki-Proctalgia fugax	wiki-Proctalgia fugax	4	B
wiki	11	3	wiki-Proctalgia fugax	wiki-Proctalgia fugax	4	B
wiki	12	3	wiki-Proctalgia fugax	wiki-Proctalgia fugax	4	B
wiki	13	3	wiki-Proctalgia fugax	wiki-Proctalgia fugax	4	B
wiki	14	4	wiki-Proctalgia fugax	wiki-Proctalgia fugax	4	B
wiki	15	1	wiki-Proctalgia fugax	wiki-Proctalgia fugax	4	B
wiki	16	4	wiki-Proctalgia fugax	wiki-Proctalgia fugax	4	B
wiki	1	5	wiki-Levator ani syndrome	wiki-Levator ani syndrome	4	B
wiki	2	5	wiki-Levator ani syndrome	wiki-Levator ani syndrome	4	B
wiki	3	4	wiki-Levator ani syndrome	wiki-Levator ani syndrome	4	B
wiki	4	5	wiki-Levator ani syndrome	wiki-Levator ani syndrome	4	B
wiki	5	5	wiki-Levator ani syndrome	wiki-Levator ani syndrome	4	B
wiki	6	4	wiki-Levator ani syndrome	wiki-Levator ani syndrome	4	B
wiki	7	5	wiki-Levator ani syndrome	wiki-Levator ani syndrome	4	B
wiki	8	4	wiki-Levator ani syndrome	wiki-Levator ani syndrome	4	B
wiki	9	4	wiki-Levator ani syndrome	wiki-Levator ani syndrome	4	B
wiki	10	4	wiki-Levator ani syndrome	wiki-Levator ani syndrome	4	B
wiki	11	1	wiki-Levator ani syndrome	wiki-Levator ani syndrome	4	B
wiki	12	2	wiki-Levator ani syndrome	wiki-Levator ani syndrome	4	B
wiki	13	4	wiki-Levator ani syndrome	wiki-Levator ani syndrome	4	B
wiki	14	5	wiki-Levator ani syndrome	wiki-Levator ani syndrome	4	B
wiki	15	1	wiki-Levator ani syndrome	wiki-Levator ani syndrome	4	B
wiki	16	4	wiki-Levator ani syndrome	wiki-Levator ani syndrome	4	B
	DicernS	Score	Titile	Titile	Dcate	Reviewer
baidu	1	3	IBS	IBS	1	A
baidu	2	4	IBS	IBS	1	A
baidu	3	3	IBS	IBS	1	A
baidu	4	2	IBS	IBS	1	A
baidu	5	5	IBS	IBS	1	A
baidu	6	3	IBS	IBS	1	A
baidu	7	1	IBS	IBS	1	A
baidu	8	3	IBS	IBS	1	A
baidu	9	3	IBS	IBS	1	A
baidu	10	3	IBS	IBS	1	A
baidu	11	2	IBS	IBS	1	A
baidu	12	1	IBS	IBS	1	A
baidu	13	1	IBS	IBS	1	A
baidu	14	3	IBS	IBS	1	A
baidu	15	3	IBS	IBS	1	A
baidu	16	3	IBS	IBS	1	A
baidu	1	3	肠易激综合征	bai-Irritable bowel syndrome	1	A
baidu	2	4	肠易激综合征	bai-Irritable bowel syndrome	1	A
baidu	3	4	肠易激综合征	bai-Irritable bowel syndrome	1	A
baidu	4	4	肠易激综合征	bai-Irritable bowel syndrome	1	A
baidu	5	5	肠易激综合征	bai-Irritable bowel syndrome	1	A
baidu	6	3	肠易激综合征	bai-Irritable bowel syndrome	1	A
baidu	7	4	肠易激综合征	bai-Irritable bowel syndrome	1	A
baidu	8	3	肠易激综合征	bai-Irritable bowel syndrome	1	A
baidu	9	3	肠易激综合征	bai-Irritable bowel syndrome	1	A
baidu	10	4	肠易激综合征	bai-Irritable bowel syndrome	1	A
baidu	11	3	肠易激综合征	bai-Irritable bowel syndrome	1	A
baidu	12	1	肠易激综合征	bai-Irritable bowel syndrome	1	A
baidu	13	1	肠易激综合征	bai-Irritable bowel syndrome	1	A
baidu	14	4	肠易激综合征	bai-Irritable bowel syndrome	1	A
baidu	15	3	肠易激综合征	bai-Irritable bowel syndrome	1	A
baidu	16	3	肠易激综合征	bai-Irritable bowel syndrome	1	A
baidu	1	5	易激结肠	bai-Irritable colon	1	A
baidu	2	5	易激结肠	bai-Irritable colon	1	A
baidu	3	4	易激结肠	bai-Irritable colon	1	A
baidu	4	2	易激结肠	bai-Irritable colon	1	A
baidu	5	1	易激结肠	bai-Irritable colon	1	A
baidu	6	3	易激结肠	bai-Irritable colon	1	A
baidu	7	4	易激结肠	bai-Irritable colon	1	A
baidu	8	4	易激结肠	bai-Irritable colon	1	A
baidu	9	4	易激结肠	bai-Irritable colon	1	A
baidu	10	4	易激结肠	bai-Irritable colon	1	A
baidu	11	3	易激结肠	bai-Irritable colon	1	A
baidu	12	1	易激结肠	bai-Irritable colon	1	A
baidu	13	1	易激结肠	bai-Irritable colon	1	A
baidu	14	4	易激结肠	bai-Irritable colon	1	A
baidu	15	3	易激结肠	bai-Irritable colon	1	A
baidu	16	3	易激结肠	bai-Irritable colon	1	A
baidu	1	3	激躁性大肠症候群	bai-Irritable colorectal syndrome	1	A
baidu	2	5	激躁性大肠症候群	bai-Irritable colorectal syndrome	1	A
baidu	3	3	激躁性大肠症候群	bai-Irritable colorectal syndrome	1	A
baidu	4	1	激躁性大肠症候群	bai-Irritable colorectal syndrome	1	A
baidu	5	1	激躁性大肠症候群	bai-Irritable colorectal syndrome	1	A
baidu	6	3	激躁性大肠症候群	bai-Irritable colorectal syndrome	1	A
baidu	7	4	激躁性大肠症候群	bai-Irritable colorectal syndrome	1	A
baidu	8	2	激躁性大肠症候群	bai-Irritable colorectal syndrome	1	A
baidu	9	4	激躁性大肠症候群	bai-Irritable colorectal syndrome	1	A
baidu	10	4	激躁性大肠症候群	bai-Irritable colorectal syndrome	1	A
baidu	11	1	激躁性大肠症候群	bai-Irritable colorectal syndrome	1	A
baidu	12	1	激躁性大肠症候群	bai-Irritable colorectal syndrome	1	A
baidu	13	1	激躁性大肠症候群	bai-Irritable colorectal syndrome	1	A
baidu	14	3	激躁性大肠症候群	bai-Irritable colorectal syndrome	1	A
baidu	15	1	激躁性大肠症候群	bai-Irritable colorectal syndrome	1	A
baidu	16	2	激躁性大肠症候群	bai-Irritable colorectal syndrome	1	A
baidu	1	2	大肠激躁症	bai-Constipation-Irritable Bowel Syndrome	1	A
baidu	2	4	大肠激躁症	bai-Constipation-Irritable Bowel Syndrome	1	A
baidu	3	2	大肠激躁症	bai-Constipation-Irritable Bowel Syndrome	1	A
baidu	4	1	大肠激躁症	bai-Constipation-Irritable Bowel Syndrome	1	A
baidu	5	1	大肠激躁症	bai-Constipation-Irritable Bowel Syndrome	1	A
baidu	6	2	大肠激躁症	bai-Constipation-Irritable Bowel Syndrome	1	A
baidu	7	1	大肠激躁症	bai-Constipation-Irritable Bowel Syndrome	1	A
baidu	8	2	大肠激躁症	bai-Constipation-Irritable Bowel Syndrome	1	A
baidu	9	1	大肠激躁症	bai-Constipation-Irritable Bowel Syndrome	1	A
baidu	10	1	大肠激躁症	bai-Constipation-Irritable Bowel Syndrome	1	A
baidu	11	1	大肠激躁症	bai-Constipation-Irritable Bowel Syndrome	1	A
baidu	12	1	大肠激躁症	bai-Constipation-Irritable Bowel Syndrome	1	A
baidu	13	1	大肠激躁症	bai-Constipation-Irritable Bowel Syndrome	1	A
baidu	14	1	大肠激躁症	bai-Constipation-Irritable Bowel Syndrome	1	A
baidu	15	1	大肠激躁症	bai-Constipation-Irritable Bowel Syndrome	1	A
baidu	16	1	大肠激躁症	bai-Constipation-Irritable Bowel Syndrome	1	A
baidu	1	2	肠躁症	bai-Intestinal mania	1	A
baidu	2	4	肠躁症	bai-Intestinal mania	1	A
baidu	3	4	肠躁症	bai-Intestinal mania	1	A
baidu	4	3	肠躁症	bai-Intestinal mania	1	A
baidu	5	3	肠躁症	bai-Intestinal mania	1	A
baidu	6	3	肠躁症	bai-Intestinal mania	1	A
baidu	7	2	肠躁症	bai-Intestinal mania	1	A
baidu	8	1	肠躁症	bai-Intestinal mania	1	A
baidu	9	1	肠躁症	bai-Intestinal mania	1	A
baidu	10	1	肠躁症	bai-Intestinal mania	1	A
baidu	11	1	肠躁症	bai-Intestinal mania	1	A
baidu	12	1	肠躁症	bai-Intestinal mania	1	A
baidu	13	1	肠躁症	bai-Intestinal mania	1	A
baidu	14	1	肠躁症	bai-Intestinal mania	1	A
baidu	15	1	肠躁症	bai-Intestinal mania	1	A
baidu	16	1	肠躁症	bai-Intestinal mania	1	A
baidu	1	3	功能性胃肠病	bai-functional gastrointestinaldisorders	2	A
baidu	2	3	功能性胃肠病	bai-functional gastrointestinaldisorders	2	A
baidu	3	3	功能性胃肠病	bai-functional gastrointestinaldisorders	2	A
baidu	4	3	功能性胃肠病	bai-functional gastrointestinaldisorders	2	A
baidu	5	4	功能性胃肠病	bai-functional gastrointestinaldisorders	2	A
baidu	6	3	功能性胃肠病	bai-functional gastrointestinaldisorders	2	A
baidu	7	4	功能性胃肠病	bai-functional gastrointestinaldisorders	2	A
baidu	8	2	功能性胃肠病	bai-functional gastrointestinaldisorders	2	A
baidu	9	3	功能性胃肠病	bai-functional gastrointestinaldisorders	2	A
baidu	10	4	功能性胃肠病	bai-functional gastrointestinaldisorders	2	A
baidu	11	1	功能性胃肠病	bai-functional gastrointestinaldisorders	2	A
baidu	12	1	功能性胃肠病	bai-functional gastrointestinaldisorders	2	A
baidu	13	3	功能性胃肠病	bai-functional gastrointestinaldisorders	2	A
baidu	14	3	功能性胃肠病	bai-functional gastrointestinaldisorders	2	A
baidu	15	3	功能性胃肠病	bai-functional gastrointestinaldisorders	2	A
baidu	16	2	功能性胃肠病	bai-functional gastrointestinaldisorders	2	A
baidu	1	5	消化不良	bai-Dyspepsia	2	A
baidu	2	5	消化不良	bai-Dyspepsia	2	A
baidu	3	4	消化不良	bai-Dyspepsia	2	A
baidu	4	1	消化不良	bai-Dyspepsia	2	A
baidu	5	1	消化不良	bai-Dyspepsia	2	A
baidu	6	3	消化不良	bai-Dyspepsia	2	A
baidu	7	4	消化不良	bai-Dyspepsia	2	A
baidu	8	2	消化不良	bai-Dyspepsia	2	A
baidu	9	3	消化不良	bai-Dyspepsia	2	A
baidu	10	3	消化不良	bai-Dyspepsia	2	A
baidu	11	1	消化不良	bai-Dyspepsia	2	A
baidu	12	1	消化不良	bai-Dyspepsia	2	A
baidu	13	1	消化不良	bai-Dyspepsia	2	A
baidu	14	1	消化不良	bai-Dyspepsia	2	A
baidu	15	1	消化不良	bai-Dyspepsia	2	A
baidu	16	2	消化不良	bai-Dyspepsia	2	A
baidu	1	3	胃肠道胀气	bai-Gastrointestinal flatulence	2	A
baidu	2	2	胃肠道胀气	bai-Gastrointestinal flatulence	2	A
baidu	3	3	胃肠道胀气	bai-Gastrointestinal flatulence	2	A
baidu	4	1	胃肠道胀气	bai-Gastrointestinal flatulence	2	A
baidu	5	3	胃肠道胀气	bai-Gastrointestinal flatulence	2	A
baidu	6	2	胃肠道胀气	bai-Gastrointestinal flatulence	2	A
baidu	7	1	胃肠道胀气	bai-Gastrointestinal flatulence	2	A
baidu	8	1	胃肠道胀气	bai-Gastrointestinal flatulence	2	A
baidu	9	2	胃肠道胀气	bai-Gastrointestinal flatulence	2	A
baidu	10	3	胃肠道胀气	bai-Gastrointestinal flatulence	2	A
baidu	11	1	胃肠道胀气	bai-Gastrointestinal flatulence	2	A
baidu	12	1	胃肠道胀气	bai-Gastrointestinal flatulence	2	A
baidu	13	1	胃肠道胀气	bai-Gastrointestinal flatulence	2	A
baidu	14	5	胃肠道胀气	bai-Gastrointestinal flatulence	2	A
baidu	15	2	胃肠道胀气	bai-Gastrointestinal flatulence	2	A
baidu	16	2	胃肠道胀气	bai-Gastrointestinal flatulence	2	A
baidu	1	3	肠痉挛	bai-Enterospasm	3	A
baidu	2	3	肠痉挛	bai-Enterospasm	3	A
baidu	3	4	肠痉挛	bai-Enterospasm	3	A
baidu	4	3	肠痉挛	bai-Enterospasm	3	A
baidu	5	4	肠痉挛	bai-Enterospasm	3	A
baidu	6	3	肠痉挛	bai-Enterospasm	3	A
baidu	7	1	肠痉挛	bai-Enterospasm	3	A
baidu	8	1	肠痉挛	bai-Enterospasm	3	A
baidu	9	4	肠痉挛	bai-Enterospasm	3	A
baidu	10	4	肠痉挛	bai-Enterospasm	3	A
baidu	11	1	肠痉挛	bai-Enterospasm	3	A
baidu	12	1	肠痉挛	bai-Enterospasm	3	A
baidu	13	1	肠痉挛	bai-Enterospasm	3	A
baidu	14	4	肠痉挛	bai-Enterospasm	3	A
baidu	15	1	肠痉挛	bai-Enterospasm	3	A
baidu	16	3	肠痉挛	bai-Enterospasm	3	A
baidu	1	3	痉挛性结肠炎	bai-Spasmodic colitis	3	A
baidu	2	2	痉挛性结肠炎	bai-Spasmodic colitis	3	A
baidu	3	3	痉挛性结肠炎	bai-Spasmodic colitis	3	A
baidu	4	1	痉挛性结肠炎	bai-Spasmodic colitis	3	A
baidu	5	3	痉挛性结肠炎	bai-Spasmodic colitis	3	A
baidu	6	3	痉挛性结肠炎	bai-Spasmodic colitis	3	A
baidu	7	1	痉挛性结肠炎	bai-Spasmodic colitis	3	A
baidu	8	1	痉挛性结肠炎	bai-Spasmodic colitis	3	A
baidu	9	1	痉挛性结肠炎	bai-Spasmodic colitis	3	A
baidu	10	1	痉挛性结肠炎	bai-Spasmodic colitis	3	A
baidu	11	1	痉挛性结肠炎	bai-Spasmodic colitis	3	A
baidu	12	1	痉挛性结肠炎	bai-Spasmodic colitis	3	A
baidu	13	1	痉挛性结肠炎	bai-Spasmodic colitis	3	A
baidu	14	1	痉挛性结肠炎	bai-Spasmodic colitis	3	A
baidu	15	1	痉挛性结肠炎	bai-Spasmodic colitis	3	A
baidu	16	2	痉挛性结肠炎	bai-Spasmodic colitis	3	A
baidu	1	4	过敏性结肠炎	bai-Allergic colitis	3	A
baidu	2	4	过敏性结肠炎	bai-Allergic colitis	3	A
baidu	3	4	过敏性结肠炎	bai-Allergic colitis	3	A
baidu	4	1	过敏性结肠炎	bai-Allergic colitis	3	A
baidu	5	3	过敏性结肠炎	bai-Allergic colitis	3	A
baidu	6	4	过敏性结肠炎	bai-Allergic colitis	3	A
baidu	7	4	过敏性结肠炎	bai-Allergic colitis	3	A
baidu	8	1	过敏性结肠炎	bai-Allergic colitis	3	A
baidu	9	3	过敏性结肠炎	bai-Allergic colitis	3	A
baidu	10	3	过敏性结肠炎	bai-Allergic colitis	3	A
baidu	11	1	过敏性结肠炎	bai-Allergic colitis	3	A
baidu	12	4	过敏性结肠炎	bai-Allergic colitis	3	A
baidu	13	1	过敏性结肠炎	bai-Allergic colitis	3	A
baidu	14	3	过敏性结肠炎	bai-Allergic colitis	3	A
baidu	15	1	过敏性结肠炎	bai-Allergic colitis	3	A
baidu	16	3	过敏性结肠炎	bai-Allergic colitis	3	A
baidu	1	3	便秘	bai-Constipation	3	A
baidu	2	4	便秘	bai-Constipation	3	A
baidu	3	4	便秘	bai-Constipation	3	A
baidu	4	4	便秘	bai-Constipation	3	A
baidu	5	5	便秘	bai-Constipation	3	A
baidu	6	4	便秘	bai-Constipation	3	A
baidu	7	4	便秘	bai-Constipation	3	A
baidu	8	1	便秘	bai-Constipation	3	A
baidu	9	4	便秘	bai-Constipation	3	A
baidu	10	4	便秘	bai-Constipation	3	A
baidu	11	1	便秘	bai-Constipation	3	A
baidu	12	1	便秘	bai-Constipation	3	A
baidu	13	1	便秘	bai-Constipation	3	A
baidu	14	4	便秘	bai-Constipation	3	A
baidu	15	1	便秘	bai-Constipation	3	A
baidu	16	3	便秘	bai-Constipation	3	A
baidu	1	4	功能性便秘	bai-Functional constipation	3	A
baidu	2	4	功能性便秘	bai-Functional constipation	3	A
baidu	3	4	功能性便秘	bai-Functional constipation	3	A
baidu	4	4	功能性便秘	bai-Functional constipation	3	A
baidu	5	5	功能性便秘	bai-Functional constipation	3	A
baidu	6	4	功能性便秘	bai-Functional constipation	3	A
baidu	7	5	功能性便秘	bai-Functional constipation	3	A
baidu	8	4	功能性便秘	bai-Functional constipation	3	A
baidu	9	4	功能性便秘	bai-Functional constipation	3	A
baidu	10	4	功能性便秘	bai-Functional constipation	3	A
baidu	11	3	功能性便秘	bai-Functional constipation	3	A
baidu	12	1	功能性便秘	bai-Functional constipation	3	A
baidu	13	1	功能性便秘	bai-Functional constipation	3	A
baidu	14	4	功能性便秘	bai-Functional constipation	3	A
baidu	15	3	功能性便秘	bai-Functional constipation	3	A
baidu	16	4	功能性便秘	bai-Functional constipation	3	A
baidu	1	3	弛缓性便秘	bai-Flaccid constipation	3	A
baidu	2	3	弛缓性便秘	bai-Flaccid constipation	3	A
baidu	3	4	弛缓性便秘	bai-Flaccid constipation	3	A
baidu	4	4	弛缓性便秘	bai-Flaccid constipation	3	A
baidu	5	5	弛缓性便秘	bai-Flaccid constipation	3	A
baidu	6	3	弛缓性便秘	bai-Flaccid constipation	3	A
baidu	7	5	弛缓性便秘	bai-Flaccid constipation	3	A
baidu	8	2	弛缓性便秘	bai-Flaccid constipation	3	A
baidu	9	4	弛缓性便秘	bai-Flaccid constipation	3	A
baidu	10	3	弛缓性便秘	bai-Flaccid constipation	3	A
baidu	11	1	弛缓性便秘	bai-Flaccid constipation	3	A
baidu	12	1	弛缓性便秘	bai-Flaccid constipation	3	A
baidu	13	1	弛缓性便秘	bai-Flaccid constipation	3	A
baidu	14	3	弛缓性便秘	bai-Flaccid constipation	3	A
baidu	15	1	弛缓性便秘	bai-Flaccid constipation	3	A
baidu	16	3	弛缓性便秘	bai-Flaccid constipation	3	A
baidu	1	4	慢性功能性便秘	bai-Chronic functional constipation	3	A
baidu	2	4	慢性功能性便秘	bai-Chronic functional constipation	3	A
baidu	3	4	慢性功能性便秘	bai-Chronic functional constipation	3	A
baidu	4	3	慢性功能性便秘	bai-Chronic functional constipation	3	A
baidu	5	4	慢性功能性便秘	bai-Chronic functional constipation	3	A
baidu	6	4	慢性功能性便秘	bai-Chronic functional constipation	3	A
baidu	7	3	慢性功能性便秘	bai-Chronic functional constipation	3	A
baidu	8	1	慢性功能性便秘	bai-Chronic functional constipation	3	A
baidu	9	3	慢性功能性便秘	bai-Chronic functional constipation	3	A
baidu	10	3	慢性功能性便秘	bai-Chronic functional constipation	3	A
baidu	11	1	慢性功能性便秘	bai-Chronic functional constipation	3	A
baidu	12	1	慢性功能性便秘	bai-Chronic functional constipation	3	A
baidu	13	1	慢性功能性便秘	bai-Chronic functional constipation	3	A
baidu	14	5	慢性功能性便秘	bai-Chronic functional constipation	3	A
baidu	15	1	慢性功能性便秘	bai-Chronic functional constipation	3	A
baidu	16	4	慢性功能性便秘	bai-Chronic functional constipation	3	A
baidu	1	3	功能性腹泻	bai-Functional diarrhea	3	A
baidu	2	3	功能性腹泻	bai-Functional diarrhea	3	A
baidu	3	4	功能性腹泻	bai-Functional diarrhea	3	A
baidu	4	3	功能性腹泻	bai-Functional diarrhea	3	A
baidu	5	4	功能性腹泻	bai-Functional diarrhea	3	A
baidu	6	4	功能性腹泻	bai-Functional diarrhea	3	A
baidu	7	1	功能性腹泻	bai-Functional diarrhea	3	A
baidu	8	2	功能性腹泻	bai-Functional diarrhea	3	A
baidu	9	3	功能性腹泻	bai-Functional diarrhea	3	A
baidu	10	3	功能性腹泻	bai-Functional diarrhea	3	A
baidu	11	1	功能性腹泻	bai-Functional diarrhea	3	A
baidu	12	1	功能性腹泻	bai-Functional diarrhea	3	A
baidu	13	1	功能性腹泻	bai-Functional diarrhea	3	A
baidu	14	3	功能性腹泻	bai-Functional diarrhea	3	A
baidu	15	1	功能性腹泻	bai-Functional diarrhea	3	A
baidu	16	3	功能性腹泻	bai-Functional diarrhea	3	A
baidu	1	2	神经源性肠道	bai-Neurogenic bowel	3	A
baidu	2	2	神经源性肠道	bai-Neurogenic bowel	3	A
baidu	3	3	神经源性肠道	bai-Neurogenic bowel	3	A
baidu	4	3	神经源性肠道	bai-Neurogenic bowel	3	A
baidu	5	4	神经源性肠道	bai-Neurogenic bowel	3	A
baidu	6	3	神经源性肠道	bai-Neurogenic bowel	3	A
baidu	7	1	神经源性肠道	bai-Neurogenic bowel	3	A
baidu	8	1	神经源性肠道	bai-Neurogenic bowel	3	A
baidu	9	1	神经源性肠道	bai-Neurogenic bowel	3	A
baidu	10	1	神经源性肠道	bai-Neurogenic bowel	3	A
baidu	11	1	神经源性肠道	bai-Neurogenic bowel	3	A
baidu	12	1	神经源性肠道	bai-Neurogenic bowel	3	A
baidu	13	1	神经源性肠道	bai-Neurogenic bowel	3	A
baidu	14	1	神经源性肠道	bai-Neurogenic bowel	3	A
baidu	15	1	神经源性肠道	bai-Neurogenic bowel	3	A
baidu	16	2	神经源性肠道	bai-Neurogenic bowel	3	A
baidu	1	3	脾曲综合征	bai-Splenic flexure syndrome	3	A
baidu	2	3	脾曲综合征	bai-Splenic flexure syndrome	3	A
baidu	3	3	脾曲综合征	bai-Splenic flexure syndrome	3	A
baidu	4	4	脾曲综合征	bai-Splenic flexure syndrome	3	A
baidu	5	1	脾曲综合征	bai-Splenic flexure syndrome	3	A
baidu	6	3	脾曲综合征	bai-Splenic flexure syndrome	3	A
baidu	7	4	脾曲综合征	bai-Splenic flexure syndrome	3	A
baidu	8	1	脾曲综合征	bai-Splenic flexure syndrome	3	A
baidu	9	1	脾曲综合征	bai-Splenic flexure syndrome	3	A
baidu	10	1	脾曲综合征	bai-Splenic flexure syndrome	3	A
baidu	11	1	脾曲综合征	bai-Splenic flexure syndrome	3	A
baidu	12	1	脾曲综合征	bai-Splenic flexure syndrome	3	A
baidu	13	1	脾曲综合征	bai-Splenic flexure syndrome	3	A
baidu	14	3	脾曲综合征	bai-Splenic flexure syndrome	3	A
baidu	15	1	脾曲综合征	bai-Splenic flexure syndrome	3	A
baidu	16	3	脾曲综合征	bai-Splenic flexure syndrome	3	A
baidu	1	2	小肠菌群过度生长综合征	bai-Enteric bacterial over-growth syndrome	3	A
baidu	2	3	小肠菌群过度生长综合征	bai-Enteric bacterial over-growth syndrome	3	A
baidu	3	3	小肠菌群过度生长综合征	bai-Enteric bacterial over-growth syndrome	3	A
baidu	4	4	小肠菌群过度生长综合征	bai-Enteric bacterial over-growth syndrome	3	A
baidu	5	4	小肠菌群过度生长综合征	bai-Enteric bacterial over-growth syndrome	3	A
baidu	6	3	小肠菌群过度生长综合征	bai-Enteric bacterial over-growth syndrome	3	A
baidu	7	1	小肠菌群过度生长综合征	bai-Enteric bacterial over-growth syndrome	3	A
baidu	8	1	小肠菌群过度生长综合征	bai-Enteric bacterial over-growth syndrome	3	A
baidu	9	1	小肠菌群过度生长综合征	bai-Enteric bacterial over-growth syndrome	3	A
baidu	10	1	小肠菌群过度生长综合征	bai-Enteric bacterial over-growth syndrome	3	A
baidu	11	1	小肠菌群过度生长综合征	bai-Enteric bacterial over-growth syndrome	3	A
baidu	12	1	小肠菌群过度生长综合征	bai-Enteric bacterial over-growth syndrome	3	A
baidu	13	1	小肠菌群过度生长综合征	bai-Enteric bacterial over-growth syndrome	3	A
baidu	14	1	小肠菌群过度生长综合征	bai-Enteric bacterial over-growth syndrome	3	A
baidu	15	1	小肠菌群过度生长综合征	bai-Enteric bacterial over-growth syndrome	3	A
baidu	16	2	小肠菌群过度生长综合征	bai-Enteric bacterial over-growth syndrome	3	A
baidu	1	3	肠道菌群失调	bai-Intestinal bacilli illness	3	A
baidu	2	3	肠道菌群失调	bai-Intestinal bacilli illness	3	A
baidu	3	4	肠道菌群失调	bai-Intestinal bacilli illness	3	A
baidu	4	4	肠道菌群失调	bai-Intestinal bacilli illness	3	A
baidu	5	4	肠道菌群失调	bai-Intestinal bacilli illness	3	A
baidu	6	3	肠道菌群失调	bai-Intestinal bacilli illness	3	A
baidu	7	4	肠道菌群失调	bai-Intestinal bacilli illness	3	A
baidu	8	3	肠道菌群失调	bai-Intestinal bacilli illness	3	A
baidu	9	4	肠道菌群失调	bai-Intestinal bacilli illness	3	A
baidu	10	4	肠道菌群失调	bai-Intestinal bacilli illness	3	A
baidu	11	1	肠道菌群失调	bai-Intestinal bacilli illness	3	A
baidu	12	1	肠道菌群失调	bai-Intestinal bacilli illness	3	A
baidu	13	1	肠道菌群失调	bai-Intestinal bacilli illness	3	A
baidu	14	4	肠道菌群失调	bai-Intestinal bacilli illness	3	A
baidu	15	1	肠道菌群失调	bai-Intestinal bacilli illness	3	A
baidu	16	4	肠道菌群失调	bai-Intestinal bacilli illness	3	A
baidu	1	3	痉挛性肛门直肠痛	bai-Proctalgia fugax	3	A
baidu	2	4	痉挛性肛门直肠痛	bai-Proctalgia fugax	3	A
baidu	3	4	痉挛性肛门直肠痛	bai-Proctalgia fugax	3	A
baidu	4	1	痉挛性肛门直肠痛	bai-Proctalgia fugax	3	A
baidu	5	1	痉挛性肛门直肠痛	bai-Proctalgia fugax	3	A
baidu	6	3	痉挛性肛门直肠痛	bai-Proctalgia fugax	3	A
baidu	7	4	痉挛性肛门直肠痛	bai-Proctalgia fugax	3	A
baidu	8	3	痉挛性肛门直肠痛	bai-Proctalgia fugax	3	A
baidu	9	4	痉挛性肛门直肠痛	bai-Proctalgia fugax	3	A
baidu	10	4	痉挛性肛门直肠痛	bai-Proctalgia fugax	3	A
baidu	11	1	痉挛性肛门直肠痛	bai-Proctalgia fugax	3	A
baidu	12	1	痉挛性肛门直肠痛	bai-Proctalgia fugax	3	A
baidu	13	1	痉挛性肛门直肠痛	bai-Proctalgia fugax	3	A
baidu	14	4	痉挛性肛门直肠痛	bai-Proctalgia fugax	3	A
baidu	15	3	痉挛性肛门直肠痛	bai-Proctalgia fugax	3	A
baidu	16	3	痉挛性肛门直肠痛	bai-Proctalgia fugax	3	A
baidu	1	3	肠管扩张	bai-Dilatation of intestine	3	A
baidu	2	4	肠管扩张	bai-Dilatation of intestine	3	A
baidu	3	4	肠管扩张	bai-Dilatation of intestine	3	A
baidu	4	1	肠管扩张	bai-Dilatation of intestine	3	A
baidu	5	1	肠管扩张	bai-Dilatation of intestine	3	A
baidu	6	3	肠管扩张	bai-Dilatation of intestine	3	A
baidu	7	4	肠管扩张	bai-Dilatation of intestine	3	A
baidu	8	1	肠管扩张	bai-Dilatation of intestine	3	A
baidu	9	3	肠管扩张	bai-Dilatation of intestine	3	A
baidu	10	3	肠管扩张	bai-Dilatation of intestine	3	A
baidu	11	1	肠管扩张	bai-Dilatation of intestine	3	A
baidu	12	1	肠管扩张	bai-Dilatation of intestine	3	A
baidu	13	1	肠管扩张	bai-Dilatation of intestine	3	A
baidu	14	3	肠管扩张	bai-Dilatation of intestine	3	A
baidu	15	1	肠管扩张	bai-Dilatation of intestine	3	A
baidu	16	3	肠管扩张	bai-Dilatation of intestine	3	A
wiki	1	4	Irritable bowel syndrome	Irritable bowel syndrome	1	A
wiki	2	5	Irritable bowel syndrome	Irritable bowel syndrome	1	A
wiki	3	4	Irritable bowel syndrome	Irritable bowel syndrome	1	A
wiki	4	4	Irritable bowel syndrome	Irritable bowel syndrome	1	A
wiki	5	5	Irritable bowel syndrome	Irritable bowel syndrome	1	A
wiki	6	4	Irritable bowel syndrome	Irritable bowel syndrome	1	A
wiki	7	4	Irritable bowel syndrome	Irritable bowel syndrome	1	A
wiki	8	4	Irritable bowel syndrome	Irritable bowel syndrome	1	A
wiki	9	4	Irritable bowel syndrome	Irritable bowel syndrome	1	A
wiki	10	4	Irritable bowel syndrome	Irritable bowel syndrome	1	A
wiki	11	4	Irritable bowel syndrome	Irritable bowel syndrome	1	A
wiki	12	1	Irritable bowel syndrome	Irritable bowel syndrome	1	A
wiki	13	1	Irritable bowel syndrome	Irritable bowel syndrome	1	A
wiki	14	4	Irritable bowel syndrome	Irritable bowel syndrome	1	A
wiki	15	3	Irritable bowel syndrome	Irritable bowel syndrome	1	A
wiki	16	4	Irritable bowel syndrome	Irritable bowel syndrome	1	A
wiki	1	5	Indigestion	Indigestion	2	A
wiki	2	5	Indigestion	Indigestion	2	A
wiki	3	4	Indigestion	Indigestion	2	A
wiki	4	4	Indigestion	Indigestion	2	A
wiki	5	5	Indigestion	Indigestion	2	A
wiki	6	4	Indigestion	Indigestion	2	A
wiki	7	4	Indigestion	Indigestion	2	A
wiki	8	4	Indigestion	Indigestion	2	A
wiki	9	4	Indigestion	Indigestion	2	A
wiki	10	4	Indigestion	Indigestion	2	A
wiki	11	2	Indigestion	Indigestion	2	A
wiki	12	1	Indigestion	Indigestion	2	A
wiki	13	1	Indigestion	Indigestion	2	A
wiki	14	4	Indigestion	Indigestion	2	A
wiki	15	1	Indigestion	Indigestion	2	A
wiki	16	4	Indigestion	Indigestion	2	A
wiki	1	3	Functional gastrointetinal disorder	Functional gastrointetinal disorder	2	A
wiki	2	3	Functional gastrointetinal disorder	Functional gastrointetinal disorder	2	A
wiki	3	3	Functional gastrointetinal disorder	Functional gastrointetinal disorder	2	A
wiki	4	4	Functional gastrointetinal disorder	Functional gastrointetinal disorder	2	A
wiki	5	5	Functional gastrointetinal disorder	Functional gastrointetinal disorder	2	A
wiki	6	3	Functional gastrointetinal disorder	Functional gastrointetinal disorder	2	A
wiki	7	4	Functional gastrointetinal disorder	Functional gastrointetinal disorder	2	A
wiki	8	3	Functional gastrointetinal disorder	Functional gastrointetinal disorder	2	A
wiki	9	3	Functional gastrointetinal disorder	Functional gastrointetinal disorder	2	A
wiki	10	2	Functional gastrointetinal disorder	Functional gastrointetinal disorder	2	A
wiki	11	1	Functional gastrointetinal disorder	Functional gastrointetinal disorder	2	A
wiki	12	1	Functional gastrointetinal disorder	Functional gastrointetinal disorder	2	A
wiki	13	1	Functional gastrointetinal disorder	Functional gastrointetinal disorder	2	A
wiki	14	4	Functional gastrointetinal disorder	Functional gastrointetinal disorder	2	A
wiki	15	3	Functional gastrointetinal disorder	Functional gastrointetinal disorder	2	A
wiki	16	4	Functional gastrointetinal disorder	Functional gastrointetinal disorder	2	A
wiki	1	5	Constipation	Constipation	3	A
wiki	2	4	Constipation	Constipation	3	A
wiki	3	4	Constipation	Constipation	3	A
wiki	4	4	Constipation	Constipation	3	A
wiki	5	5	Constipation	Constipation	3	A
wiki	6	4	Constipation	Constipation	3	A
wiki	7	4	Constipation	Constipation	3	A
wiki	8	3	Constipation	Constipation	3	A
wiki	9	4	Constipation	Constipation	3	A
wiki	10	4	Constipation	Constipation	3	A
wiki	11	3	Constipation	Constipation	3	A
wiki	12	1	Constipation	Constipation	3	A
wiki	13	1	Constipation	Constipation	3	A
wiki	14	4	Constipation	Constipation	3	A
wiki	15	3	Constipation	Constipation	3	A
wiki	16	4	Constipation	Constipation	3	A
wiki	1	3	Functional constipation	Functional constipation	3	A
wiki	2	3	Functional constipation	Functional constipation	3	A
wiki	3	4	Functional constipation	Functional constipation	3	A
wiki	4	4	Functional constipation	Functional constipation	3	A
wiki	5	5	Functional constipation	Functional constipation	3	A
wiki	6	4	Functional constipation	Functional constipation	3	A
wiki	7	5	Functional constipation	Functional constipation	3	A
wiki	8	3	Functional constipation	Functional constipation	3	A
wiki	9	1	Functional constipation	Functional constipation	3	A
wiki	10	1	Functional constipation	Functional constipation	3	A
wiki	11	1	Functional constipation	Functional constipation	3	A
wiki	12	1	Functional constipation	Functional constipation	3	A
wiki	13	1	Functional constipation	Functional constipation	3	A
wiki	14	3	Functional constipation	Functional constipation	3	A
wiki	15	1	Functional constipation	Functional constipation	3	A
wiki	16	3	Functional constipation	Functional constipation	3	A
wiki	1	3	Neurogenic bowel dusfunction	Neurogenic bowel dusfunction	3	A
wiki	2	4	Neurogenic bowel dusfunction	Neurogenic bowel dusfunction	3	A
wiki	3	4	Neurogenic bowel dusfunction	Neurogenic bowel dusfunction	3	A
wiki	4	5	Neurogenic bowel dusfunction	Neurogenic bowel dusfunction	3	A
wiki	5	5	Neurogenic bowel dusfunction	Neurogenic bowel dusfunction	3	A
wiki	6	4	Neurogenic bowel dusfunction	Neurogenic bowel dusfunction	3	A
wiki	7	4	Neurogenic bowel dusfunction	Neurogenic bowel dusfunction	3	A
wiki	8	1	Neurogenic bowel dusfunction	Neurogenic bowel dusfunction	3	A
wiki	9	3	Neurogenic bowel dusfunction	Neurogenic bowel dusfunction	3	A
wiki	10	1	Neurogenic bowel dusfunction	Neurogenic bowel dusfunction	3	A
wiki	11	1	Neurogenic bowel dusfunction	Neurogenic bowel dusfunction	3	A
wiki	12	1	Neurogenic bowel dusfunction	Neurogenic bowel dusfunction	3	A
wiki	13	1	Neurogenic bowel dusfunction	Neurogenic bowel dusfunction	3	A
wiki	14	1	Neurogenic bowel dusfunction	Neurogenic bowel dusfunction	3	A
wiki	15	3	Neurogenic bowel dusfunction	Neurogenic bowel dusfunction	3	A
wiki	16	3	Neurogenic bowel dusfunction	Neurogenic bowel dusfunction	3	A
wiki	1	4	Intestinal malrotation	Intestinal malrotation	3	A
wiki	2	4	Intestinal malrotation	Intestinal malrotation	3	A
wiki	3	4	Intestinal malrotation	Intestinal malrotation	3	A
wiki	4	4	Intestinal malrotation	Intestinal malrotation	3	A
wiki	5	5	Intestinal malrotation	Intestinal malrotation	3	A
wiki	6	4	Intestinal malrotation	Intestinal malrotation	3	A
wiki	7	4	Intestinal malrotation	Intestinal malrotation	3	A
wiki	8	3	Intestinal malrotation	Intestinal malrotation	3	A
wiki	9	3	Intestinal malrotation	Intestinal malrotation	3	A
wiki	10	3	Intestinal malrotation	Intestinal malrotation	3	A
wiki	11	1	Intestinal malrotation	Intestinal malrotation	3	A
wiki	12	1	Intestinal malrotation	Intestinal malrotation	3	A
wiki	13	1	Intestinal malrotation	Intestinal malrotation	3	A
wiki	14	3	Intestinal malrotation	Intestinal malrotation	3	A
wiki	15	1	Intestinal malrotation	Intestinal malrotation	3	A
wiki	16	3	Intestinal malrotation	Intestinal malrotation	3	A
wiki	1	4	Dysbiosis	Dysbiosis	3	A
wiki	2	4	Dysbiosis	Dysbiosis	3	A
wiki	3	4	Dysbiosis	Dysbiosis	3	A
wiki	4	4	Dysbiosis	Dysbiosis	3	A
wiki	5	5	Dysbiosis	Dysbiosis	3	A
wiki	6	4	Dysbiosis	Dysbiosis	3	A
wiki	7	4	Dysbiosis	Dysbiosis	3	A
wiki	8	3	Dysbiosis	Dysbiosis	3	A
wiki	9	4	Dysbiosis	Dysbiosis	3	A
wiki	10	4	Dysbiosis	Dysbiosis	3	A
wiki	11	1	Dysbiosis	Dysbiosis	3	A
wiki	12	1	Dysbiosis	Dysbiosis	3	A
wiki	13	1	Dysbiosis	Dysbiosis	3	A
wiki	14	4	Dysbiosis	Dysbiosis	3	A
wiki	15	1	Dysbiosis	Dysbiosis	3	A
wiki	16	4	Dysbiosis	Dysbiosis	3	A
wiki	1	4	Small intestinal bacterial overgrowth	Small intestinal bacterial overgrowth	3	A
wiki	2	4	Small intestinal bacterial overgrowth	Small intestinal bacterial overgrowth	3	A
wiki	3	4	Small intestinal bacterial overgrowth	Small intestinal bacterial overgrowth	3	A
wiki	4	4	Small intestinal bacterial overgrowth	Small intestinal bacterial overgrowth	3	A
wiki	5	5	Small intestinal bacterial overgrowth	Small intestinal bacterial overgrowth	3	A
wiki	6	4	Small intestinal bacterial overgrowth	Small intestinal bacterial overgrowth	3	A
wiki	7	4	Small intestinal bacterial overgrowth	Small intestinal bacterial overgrowth	3	A
wiki	8	3	Small intestinal bacterial overgrowth	Small intestinal bacterial overgrowth	3	A
wiki	9	4	Small intestinal bacterial overgrowth	Small intestinal bacterial overgrowth	3	A
wiki	10	4	Small intestinal bacterial overgrowth	Small intestinal bacterial overgrowth	3	A
wiki	11	3	Small intestinal bacterial overgrowth	Small intestinal bacterial overgrowth	3	A
wiki	12	1	Small intestinal bacterial overgrowth	Small intestinal bacterial overgrowth	3	A
wiki	13	1	Small intestinal bacterial overgrowth	Small intestinal bacterial overgrowth	3	A
wiki	14	4	Small intestinal bacterial overgrowth	Small intestinal bacterial overgrowth	3	A
wiki	15	1	Small intestinal bacterial overgrowth	Small intestinal bacterial overgrowth	3	A
wiki	16	4	Small intestinal bacterial overgrowth	Small intestinal bacterial overgrowth	3	A
wiki	1	3	Proctalgia fugax	Proctalgia fugax	3	A
wiki	2	4	Proctalgia fugax	Proctalgia fugax	3	A
wiki	3	4	Proctalgia fugax	Proctalgia fugax	3	A
wiki	4	4	Proctalgia fugax	Proctalgia fugax	3	A
wiki	5	5	Proctalgia fugax	Proctalgia fugax	3	A
wiki	6	4	Proctalgia fugax	Proctalgia fugax	3	A
wiki	7	4	Proctalgia fugax	Proctalgia fugax	3	A
wiki	8	3	Proctalgia fugax	Proctalgia fugax	3	A
wiki	9	3	Proctalgia fugax	Proctalgia fugax	3	A
wiki	10	3	Proctalgia fugax	Proctalgia fugax	3	A
wiki	11	1	Proctalgia fugax	Proctalgia fugax	3	A
wiki	12	1	Proctalgia fugax	Proctalgia fugax	3	A
wiki	13	1	Proctalgia fugax	Proctalgia fugax	3	A
wiki	14	4	Proctalgia fugax	Proctalgia fugax	3	A
wiki	15	1	Proctalgia fugax	Proctalgia fugax	3	A
wiki	16	3	Proctalgia fugax	Proctalgia fugax	3	A
wiki	1	3	Levator ani syndrome	Levator ani syndrome	3	A
wiki	2	3	Levator ani syndrome	Levator ani syndrome	3	A
wiki	3	4	Levator ani syndrome	Levator ani syndrome	3	A
wiki	4	4	Levator ani syndrome	Levator ani syndrome	3	A
wiki	5	5	Levator ani syndrome	Levator ani syndrome	3	A
wiki	6	4	Levator ani syndrome	Levator ani syndrome	3	A
wiki	7	4	Levator ani syndrome	Levator ani syndrome	3	A
wiki	8	3	Levator ani syndrome	Levator ani syndrome	3	A
wiki	9	3	Levator ani syndrome	Levator ani syndrome	3	A
wiki	10	3	Levator ani syndrome	Levator ani syndrome	3	A
wiki	11	1	Levator ani syndrome	Levator ani syndrome	3	A
wiki	12	1	Levator ani syndrome	Levator ani syndrome	3	A
wiki	13	1	Levator ani syndrome	Levator ani syndrome	3	A
wiki	14	1	Levator ani syndrome	Levator ani syndrome	3	A
wiki	15	1	Levator ani syndrome	Levator ani syndrome	3	A
wiki	16	3	Levator ani syndrome	Levator ani syndrome	3	A

## Sheet: JAMA+GSP
RevA	RevB	Title	English Titile	疾病分类/ 4 theme of FGIDs which have symptoms that overlap with IBS	JAMA1	JAMA2	JAMA3	JAMA4	JT		GQS
	B	bai-IBS	bai-IBS	1	1	1	1	1	4		4
	B	bai-肠易激综合征	bai-Irritable bowel syndrome	1	1	1	1	1	4		4
	B	bai-易激结肠	bai-Irritable colon	1	0	0	1	1	2		3
	B	bai-激躁性大肠症候群	bai-Irritable colorectal syndrome	1	0	0	1	1	2		3
	B	bai-大肠激躁症	bai-Constipation-Irritable Bowel Syndrome	1	0	0	1	1	2		2
	B	bai-肠躁症	bai-Intestinal mania	1	0	1	1	1	3		1
	B	bai-功能性胃肠病	bai-functional gastrointestinaldisorders	2	1	1	1	1	4		3
	B	bai-消化不良	bai-Dyspepsia	2	0	0	1	1	2		5
	B	bai-胃肠道胀气	bai-Gastrointestinal flatulence	2	0	1	1	1	3		5
	B	bai-肠痉挛	bai-Enterospasm	3	1	0	1	1	3		3
	B	bai-痉挛性结肠炎	bai-Spasmodic colitis	3	0	0	1	1	2		2
	B	bai-过敏性结肠炎	bai-Allergic colitis	3	0	0	1	1	2		3
	B	bai-便秘	bai-Constipation	3	1	0	1	1	3		3
	B	bai-功能性便秘	bai-Functional constipation	3	1	1	1	1	4		5
	B	bai-弛缓性便秘	bai-Flaccid constipation	3	0	1	1	1	3		3
	B	bai-慢性功能性便秘	bai-Chronic functional constipation	3	0	1	1	1	3		4
	B	bai-功能性腹泻	bai-Functional diarrhea	3	1	0	1	1	3		4
	B	bai-神经源性肠道	bai-Neurogenic bowel	3	0	1	1	1	3		1
	B	bai-脾曲综合征	bai-Splenic flexure syndrome	3	0	1	1	1	3		2
	B	bai-小肠菌群过度生长综合征	bai-Enteric bacterial over-growth syndrome	3	0	1	1	1	3		2
	B	bai-肠道菌群失调	bai-Intestinal bacilli illness	3	1	1	1	1	4		4
	B	bai-痉挛性肛门直肠痛	bai-Proctalgia fugax	4	0	0	1	1	2		4
	B	bai-肠管扩张	bai-Dilatation of intestine	4	0	0	1	1	2		3
	B	wiki-Irritable bowel syndrome	wiki-Irritable bowel syndrome	1	1	1	1	1	4		5
	B	wiki-Indigestion	wiki-Indigestion	2	1	1	1	1	4		4
	B	wiki-Functional gastrointetinal disorder	wiki-Functional gastrointetinal disorder	3	1	1	1	1	4		2
	B	wiki-Constipation	wiki-Constipation	3	1	1	1	1	4		5
	B	wiki-Functional constipation	wiki-Functional constipation	3	1	1	1	1	4		3
	B	wiki-Neurogenic bowel dusfunction	wiki-Neurogenic bowel dusfunction	3	1	1	1	1	4		4
	B	wiki-Intestinal malrotation	wiki-Intestinal malrotation	3	1	1	1	1	4		4
	B	wiki-Dysbiosis	wiki-Dysbiosis	3	1	1	1	1	4		5
	B	wiki-Small intestinal bacterial overgrowth	wiki-Small intestinal bacterial overgrowth	3	1	1	1	1	4		5
	B	wiki-Proctalgia fugax	wiki-Proctalgia fugax	4	1	1	1	1	4		5
	B	wiki-Levator ani syndrome	wiki-Levator ani syndrome	4	1	1	1	1	4		4
A		ITEM	ITEM		JAMA1	JAMA2	JAMA3	JAMA4	JT		GQS
A		IBS	bai-IBS	1	0	1	1	1	3		3
A		肠易激综合征	bai-Irritable bowel syndrome	1	1	1	1	1	4		4
A		易激结肠	bai-Irritable colon	1	0	0	1	1	2		3
A		激躁性大肠症候群	bai-Irritable colorectal syndrome	1	0	0	1	1	2		2
A		大肠激躁症	bai-Constipation-Irritable Bowel Syndrome	1	0	0	1	1	2		2
A		肠躁症	bai-Intestinal mania	1	0	1	1	1	3		2
A		功能性胃肠病	bai-functional gastrointestinaldisorders	2	1	1	1	1	4		4
A		消化不良	bai-Dyspepsia	2	0	0	1	1	2		4
A		胃肠道胀气	bai-Gastrointestinal flatulence	2	0	1	1	1	3		4
A		肠痉挛	bai-Enterospasm	3	1	1	1	1	4		4
A		痉挛性结肠炎	bai-Spasmodic colitis	3	0	0	1	1	2		2
A		过敏性结肠炎	bai-Allergic colitis	3	0	0	1	1	2		4
A		便秘	bai-Constipation	3	1	1	1	1	4		4
A		功能性便秘	bai-Functional constipation	3	1	1	1	1	4		4
A		弛缓性便秘	bai-Flaccid constipation	3	0	1	1	1	3		3
A		慢性功能性便秘	bai-Chronic functional constipation	3	0	1	1	1	3		3
A		功能性腹泻	bai-Functional diarrhea	3	1	1	1	1	4		3
A		神经源性肠道	bai-Neurogenic bowel	3	0	1	1	1	3		2
A		脾曲综合征	bai-Splenic flexure syndrome	3	0	1	1	1	3		2
A		小肠菌群过度生长综合征	bai-Enteric bacterial over-growth syndrome	3	0	1	1	1	3		2
A		肠道菌群失调	bai-Intestinal bacilli illness	3	1	1	1	1	4		4
A		痉挛性肛门直肠痛	bai-Proctalgia fugax	4	0	0	1	1	2		3
A		肠管扩张	bai-Dilatation of intestine	4	0	0	1	1	2		3
A		Irritable bowel syndrome	Irritable bowel syndrome	1	1	1	1	1	4		4
A		Indigestion	Indigestion	2	1	1	1	1	4		4
A		Functional gastrointetinal disorder	Functional gastrointetinal disorder	3	1	1	1	1	4		3
A		Constipation	Constipation	3	1	1	1	1	4		3
A		Functional constipation	Functional constipation	3	1	1	1	1	4		3
A		Neurogenic bowel dusfunction	Neurogenic bowel dusfunction	3	1	1	1	1	4		3
A		Intestinal malrotation	Intestinal malrotation	3	1	1	1	1	4		3
A		Dysbiosis	Dysbiosis	3	1	1	1	1	4		4
A		Small intestinal bacterial overgrowth	Small intestinal bacterial overgrowth	3	1	1	1	1	4		4
A		Proctalgia fugax	Proctalgia fugax	4	1	1	1	1	4		3
A		Levator ani syndrome	Levator ani syndrome	4	1	1	1	1	4		3
